# Supplementary material for: Differences in Collaboration Patterns across Discipline, Career Stage, and Gender
Source: PLoS Biol. 2016 Nov 4;14(11):e1002573. doi: 10.1371/journal.pbio.1002573 (PMC5096717; doi:10.1371/journal.pbio.1002573)
Supplement: S4 Data — (XLSX) [file pbio.1002573.s021.xlsx]

## Sheet: Fig 4
category	frac_pubs	journal_title	coauthors	circle_size	journal_size
MULTIDISCIPLINARY SCIENCES	0.162542	PROCEEDINGS OF THE NATIONAL ACADEMY OF SCIENCES OF THE UNITED STATES OF AMERICA	1.01752	2.66322	3556
BIOCHEMISTRY & MOLECULAR BIOLOGY	0.141399	JOURNAL OF BIOLOGICAL CHEMISTRY	0.940548	2.6321	3232
CELL BIOLOGY	0.185759	CELL	1.085	2.40613	1615
BIOCHEMISTRY & MOLECULAR BIOLOGY	0.185759	CELL	1.085	1.20306	1615
MULTIDISCIPLINARY SCIENCES	0.123588	NATURE	1.62951	2.38315	1505
MULTIDISCIPLINARY SCIENCES	0.163663	SCIENCE	1.56871	2.35656	1387
BIOCHEMISTRY & MOLECULAR BIOLOGY	0.244015	BIOCHEMISTRY	0.870977	2.3342	1295
CELL BIOLOGY	0.203854	MOLECULAR AND CELLULAR BIOLOGY	0.970634	2.24541	986
BIOCHEMISTRY & MOLECULAR BIOLOGY	0.203854	MOLECULAR AND CELLULAR BIOLOGY	0.970634	1.1227	986
BIOCHEMISTRY & MOLECULAR BIOLOGY	0.182857	JOURNAL OF MOLECULAR BIOLOGY	0.874065	2.20651	875
VIROLOGY	0.192506	JOURNAL OF VIROLOGY	0.921384	2.16656	774
MICROBIOLOGY	0.202514	JOURNAL OF BACTERIOLOGY	0.764135	2.14118	716
CHEMISTRY, MULTIDISCIPLINARY	0.31831	JOURNAL OF THE AMERICAN CHEMICAL SOCIETY	0.862481	2.13844	710
DEVELOPMENTAL BIOLOGY	0.284866	GENES & DEVELOPMENT	0.897763	2.12149	674
GENETICS & HEREDITY	0.284866	GENES & DEVELOPMENT	0.897763	1.41433	674
CELL BIOLOGY	0.284866	GENES & DEVELOPMENT	0.897763	0.707165	674
BIOCHEMISTRY & MOLECULAR BIOLOGY	0.243728	NUCLEIC ACIDS RESEARCH	1.0625	2.05998	558
DEVELOPMENTAL BIOLOGY	0.227357	DEVELOPMENT	0.880532	2.0499	541
NEUROSCIENCES	0.154739	JOURNAL OF NEUROSCIENCE	0.868917	2.03512	517
CELL BIOLOGY	0.226824	EMBO JOURNAL	0.94494	2.02876	507
BIOCHEMISTRY & MOLECULAR BIOLOGY	0.226824	EMBO JOURNAL	0.94494	1.01438	507
IMMUNOLOGY	0.247917	JOURNAL OF IMMUNOLOGY	1.08306	2.01093	480
GENETICS & HEREDITY	0.30719	GENETICS	0.747594	1.99636	459
ONCOLOGY	0.115385	CANCER RESEARCH	1.32414	1.96432	416
NEUROSCIENCES	0.225806	NEURON	1.00789	1.92791	372
CELL BIOLOGY	0.27027	MOLECULAR CELL	0.932075	1.92615	370
BIOCHEMISTRY & MOLECULAR BIOLOGY	0.27027	MOLECULAR CELL	0.932075	0.963076	370
VIROLOGY	0.228169	VIROLOGY	0.956149	1.91267	355
DEVELOPMENTAL BIOLOGY	0.139535	DEVELOPMENTAL BIOLOGY	0.778598	1.90242	344
BIOLOGY	0.169591	PROCEEDINGS OF THE NATIONAL ACADEMY OF SCIENCES OF THE UNITED STATES OF AMERICA-BIOLOGICAL SCIENCES	1.10183	1.90052	342
CELL BIOLOGY	0.236196	CURRENT BIOLOGY	0.725715	1.88491	326
BIOCHEMISTRY & MOLECULAR BIOLOGY	0.236196	CURRENT BIOLOGY	0.725715	0.942457	326
CELL BIOLOGY	0.201299	MOLECULAR BIOLOGY OF THE CELL	0.815441	1.86641	308
GENETICS & HEREDITY	0.0912052	NATURE GENETICS	1.85046	1.86535	307
BIOPHYSICS	0.112319	BIOCHEMICAL AND BIOPHYSICAL RESEARCH COMMUNICATIONS	0.918312	1.83068	276
BIOCHEMISTRY & MOLECULAR BIOLOGY	0.112319	BIOCHEMICAL AND BIOPHYSICAL RESEARCH COMMUNICATIONS	0.918312	0.915341	276
HEMATOLOGY	0.154762	BLOOD	1.33771	1.80105	252
BIOLOGY	0.194332	COLD SPRING HARBOR SYMPOSIA ON QUANTITATIVE BIOLOGY	1.28429	1.79452	247
BIOCHEMISTRY & MOLECULAR BIOLOGY	0.194332	COLD SPRING HARBOR SYMPOSIA ON QUANTITATIVE BIOLOGY	1.28429	0.897261	247
MICROBIOLOGY	0.314159	MOLECULAR MICROBIOLOGY	0.730482	1.76558	226
BIOCHEMISTRY & MOLECULAR BIOLOGY	0.314159	MOLECULAR MICROBIOLOGY	0.730482	0.882791	226
MEDICINE, RESEARCH & EXPERIMENTAL	0.237668	JOURNAL OF EXPERIMENTAL MEDICINE	1.20584	1.76123	223
IMMUNOLOGY	0.237668	JOURNAL OF EXPERIMENTAL MEDICINE	1.20584	0.880614	223
BIOPHYSICS	0.0952381	BIOCHIMICA ET BIOPHYSICA ACTA	0.895775	1.70735	189
BIOCHEMISTRY & MOLECULAR BIOLOGY	0.0952381	BIOCHIMICA ET BIOPHYSICA ACTA	0.895775	0.853673	189
CELL BIOLOGY	0.154696	JOURNAL OF CELL SCIENCE	0.79766	1.69326	181
ONCOLOGY	0.135294	ONCOGENE	1.09814	1.67284	170
GENETICS & HEREDITY	0.135294	ONCOGENE	1.09814	1.25463	170
CELL BIOLOGY	0.135294	ONCOGENE	1.09814	0.836418	170
BIOCHEMISTRY & MOLECULAR BIOLOGY	0.135294	ONCOGENE	1.09814	0.418209	170
BIOCHEMISTRY & MOLECULAR BIOLOGY	0.278107	RNA-A PUBLICATION OF THE RNA SOCIETY	0.710747	1.67092	169
BIOCHEMISTRY & MOLECULAR BIOLOGY	0.164557	PROTEIN SCIENCE	0.713155	1.64899	158
PLANT SCIENCES	0.324138	PLANT PHYSIOLOGY	0.812751	1.62103	145
PLANT SCIENCES	0.2	PLANT CELL	0.965526	1.62103	145
CELL BIOLOGY	0.2	PLANT CELL	0.965526	1.08068	145
BIOCHEMISTRY & MOLECULAR BIOLOGY	0.2	PLANT CELL	0.965526	0.540342	145
ENDOCRINOLOGY & METABOLISM	0.15493	ENDOCRINOLOGY	1.09922	1.61422	142
CHEMISTRY, ORGANIC	0.177305	JOURNAL OF ORGANIC CHEMISTRY	0.76796	1.61191	141
BIOCHEMISTRY & MOLECULAR BIOLOGY	0.201439	CHEMISTRY & BIOLOGY	0.811698	1.60726	139
CHEMISTRY, ORGANIC	0.181159	TETRAHEDRON LETTERS	0.667922	1.60491	138
BIOLOGY	0.167883	PLOS BIOLOGY	0.979456	1.60254	137
BIOCHEMISTRY & MOLECULAR BIOLOGY	0.167883	PLOS BIOLOGY	0.979456	0.80127	137
BIOPHYSICS	0.216418	NATURE STRUCTURAL BIOLOGY	0.767855	1.59533	134
CELL BIOLOGY	0.216418	NATURE STRUCTURAL BIOLOGY	0.767855	1.06355	134
BIOCHEMISTRY & MOLECULAR BIOLOGY	0.216418	NATURE STRUCTURAL BIOLOGY	0.767855	0.531776	134
BIOPHYSICS	0.106061	FEBS LETTERS	0.998863	1.59043	132
CELL BIOLOGY	0.106061	FEBS LETTERS	0.998863	1.06029	132
BIOCHEMISTRY & MOLECULAR BIOLOGY	0.106061	FEBS LETTERS	0.998863	0.530143	132
BIOTECHNOLOGY & APPLIED MICROBIOLOGY	0.15748	GENOME RESEARCH	1.49034	1.57785	127
GENETICS & HEREDITY	0.15748	GENOME RESEARCH	1.49034	1.0519	127
BIOCHEMISTRY & MOLECULAR BIOLOGY	0.15748	GENOME RESEARCH	1.49034	0.525951	127
BIOCHEMISTRY & MOLECULAR BIOLOGY	0.152	BIOCHEMICAL JOURNAL	1.06105	1.57268	125
BIOCHEMICAL RESEARCH METHODS	0.0967742	ANALYTICAL BIOCHEMISTRY	0.752896	1.57007	124
CHEMISTRY, ANALYTICAL	0.0967742	ANALYTICAL BIOCHEMISTRY	0.752896	1.04671	124
BIOCHEMISTRY & MOLECULAR BIOLOGY	0.0967742	ANALYTICAL BIOCHEMISTRY	0.752896	0.523355	124
BIOLOGY	0.128205	PLOS ONE	0.915294	1.55114	117
GENETICS & HEREDITY	0.222222	GENE	0.965913	1.55114	117
OPHTHALMOLOGY	0.12931	INVESTIGATIVE OPHTHALMOLOGY & VISUAL SCIENCE	0.996484	1.54834	116
BIOPHYSICS	0.0900901	ARCHIVES OF BIOCHEMISTRY AND BIOPHYSICS	0.838089	1.53399	111
BIOCHEMISTRY & MOLECULAR BIOLOGY	0.0900901	ARCHIVES OF BIOCHEMISTRY AND BIOPHYSICS	0.838089	0.766996	111
CARDIAC & CARDIOVASCULAR SYSTEMS	0.25	CIRCULATION RESEARCH	1.35847	1.51278	104
PERIPHERAL VASCULAR DISEASE	0.25	CIRCULATION RESEARCH	1.35847	1.00852	104
HEMATOLOGY	0.25	CIRCULATION RESEARCH	1.35847	0.504258	104
PHYSIOLOGY	0.163462	JOURNAL OF PHYSIOLOGY-LONDON	0.668398	1.51278	104
NEUROSCIENCES	0.163462	JOURNAL OF PHYSIOLOGY-LONDON	0.668398	0.756388	104
BIOPHYSICS	0.245098	STRUCTURE	0.786601	1.50645	102
CELL BIOLOGY	0.245098	STRUCTURE	0.786601	1.0043	102
BIOCHEMISTRY & MOLECULAR BIOLOGY	0.245098	STRUCTURE	0.786601	0.50215	102
DEVELOPMENTAL BIOLOGY	0.33	DEVELOPMENTAL CELL	0.940089	1.5	100
CELL BIOLOGY	0.33	DEVELOPMENTAL CELL	0.940089	0.75	100
CELL BIOLOGY	0.222222	NATURE CELL BIOLOGY	0.799163	1.49673	99
ZOOLOGY	0.225806	JOURNAL OF COMPARATIVE NEUROLOGY	0.705387	1.47636	93
NEUROSCIENCES	0.225806	JOURNAL OF COMPARATIVE NEUROLOGY	0.705387	0.738181	93
PATHOLOGY	0.155556	AMERICAN JOURNAL OF PATHOLOGY	1.35016	1.46568	90
MULTIDISCIPLINARY SCIENCES	0.155556	ANNALS OF THE NEW YORK ACADEMY OF SCIENCES	1.23389	1.46568	90
CHEMISTRY, MEDICINAL	0.111111	JOURNAL OF MEDICINAL CHEMISTRY	1.33822	1.46568	90
IMMUNOLOGY	0.151163	IMMUNITY	1.20106	1.45087	86
CHEMISTRY, MEDICINAL	0.141176	BIOORGANIC & MEDICINAL CHEMISTRY LETTERS	1.01953	1.44706	85
CHEMISTRY, ORGANIC	0.141176	BIOORGANIC & MEDICINAL CHEMISTRY LETTERS	1.01953	0.723532	85
GENETICS & HEREDITY	0.261905	MOLECULAR & GENERAL GENETICS	0.848639	1.44321	84
BIOCHEMISTRY & MOLECULAR BIOLOGY	0.261905	MOLECULAR & GENERAL GENETICS	0.848639	0.721605	84
NEUROSCIENCES	0.108434	NATURE NEUROSCIENCE	0.90261	1.43931	83
CHEMISTRY, ORGANIC	0.175	ORGANIC LETTERS	0.623822	1.42732	80
PLANT SCIENCES	0.223684	PLANT JOURNAL	0.946941	1.41061	76
ONCOLOGY	0.133333	EXPERIMENTAL CELL RESEARCH	0.850023	1.4063	75
CELL BIOLOGY	0.133333	EXPERIMENTAL CELL RESEARCH	0.850023	0.703148	75
ANATOMY & MORPHOLOGY	0.246575	DEVELOPMENTAL DYNAMICS	0.793666	1.39749	73
DEVELOPMENTAL BIOLOGY	0.246575	DEVELOPMENTAL DYNAMICS	0.793666	0.698746	73
BIOTECHNOLOGY & APPLIED MICROBIOLOGY	0.225352	GENOME BIOLOGY	1.04361	1.38844	71
GENETICS & HEREDITY	0.225352	GENOME BIOLOGY	1.04361	0.694222	71
ENDOCRINOLOGY & METABOLISM	0.140845	MOLECULAR ENDOCRINOLOGY	1.01976	1.38844	71
GENETICS & HEREDITY	0.289855	PLOS GENETICS	1.05433	1.37914	69
NEUROSCIENCES	0.130435	JOURNAL OF NEUROCHEMISTRY	0.904491	1.37914	69
BIOCHEMISTRY & MOLECULAR BIOLOGY	0.130435	JOURNAL OF NEUROCHEMISTRY	0.904491	0.689568	69
INFECTIOUS DISEASES	0.106061	JOURNAL OF INFECTIOUS DISEASES	1.06981	1.36466	66
IMMUNOLOGY	0.106061	JOURNAL OF INFECTIOUS DISEASES	1.06981	0.909772	66
MICROBIOLOGY	0.106061	JOURNAL OF INFECTIOUS DISEASES	1.06981	0.454886	66
PLANT SCIENCES	0.272727	PLANT MOLECULAR BIOLOGY	0.916355	1.36466	66
BIOCHEMISTRY & MOLECULAR BIOLOGY	0.272727	PLANT MOLECULAR BIOLOGY	0.916355	0.682329	66
BIOCHEMISTRY & MOLECULAR BIOLOGY	0.15873	JOURNAL OF LIPID RESEARCH	1.04829	1.34951	63
PHARMACOLOGY & PHARMACY	0.129032	MOLECULAR PHARMACOLOGY	0.950306	1.34429	62
ONCOLOGY	0.180328	MOLECULAR CARCINOGENESIS	1.06454	1.339	61
BIOCHEMISTRY & MOLECULAR BIOLOGY	0.180328	MOLECULAR CARCINOGENESIS	1.06454	0.669499	61
CARDIAC & CARDIOVASCULAR SYSTEMS	0.278689	AMERICAN JOURNAL OF PHYSIOLOGY-HEART AND CIRCULATORY PHYSIOLOGY	0.935435	1.339	61
PERIPHERAL VASCULAR DISEASE	0.278689	AMERICAN JOURNAL OF PHYSIOLOGY-HEART AND CIRCULATORY PHYSIOLOGY	0.935435	0.892665	61
PHYSIOLOGY	0.278689	AMERICAN JOURNAL OF PHYSIOLOGY-HEART AND CIRCULATORY PHYSIOLOGY	0.935435	0.446332	61
CELL BIOLOGY	0.25	CELL CYCLE	0.510202	1.33361	60
CHEMISTRY, MULTIDISCIPLINARY	0.305085	ANGEWANDTE CHEMIE-INTERNATIONAL EDITION	0.807087	1.32814	59
IMMUNOLOGY	0.137931	EUROPEAN JOURNAL OF IMMUNOLOGY	1.06801	1.32257	58
CHEMISTRY, ORGANIC	0.12069	TETRAHEDRON	0.759879	1.32257	58
CELL BIOLOGY	0.192982	CURRENT OPINION IN CELL BIOLOGY	0.40664	1.31691	57
CHEMISTRY, MULTIDISCIPLINARY	0.140351	CHEMICAL COMMUNICATIONS	0.802378	1.31691	57
BIOCHEMISTRY & MOLECULAR BIOLOGY	0.0909091	EUROPEAN JOURNAL OF BIOCHEMISTRY	1.1467	1.30527	55
NEUROSCIENCES	0.12963	JOURNAL OF NEUROBIOLOGY	0.664751	1.2993	54
CHEMISTRY, MEDICINAL	0.169811	BIOORGANIC & MEDICINAL CHEMISTRY	1.01128	1.29321	53
CHEMISTRY, ORGANIC	0.169811	BIOORGANIC & MEDICINAL CHEMISTRY	1.01128	0.862138	53
BIOCHEMISTRY & MOLECULAR BIOLOGY	0.169811	BIOORGANIC & MEDICINAL CHEMISTRY	1.01128	0.431069	53
BIOLOGY	0.215686	FASEB JOURNAL	1.00312	1.28068	51
CELL BIOLOGY	0.215686	FASEB JOURNAL	1.00312	0.853785	51
BIOCHEMISTRY & MOLECULAR BIOLOGY	0.215686	FASEB JOURNAL	1.00312	0.426893	51
ONCOLOGY	0.22	CANCER CELL	1.56956	1.27423	50
CELL BIOLOGY	0.22	CANCER CELL	1.56956	0.637114	50
BIOCHEMISTRY & MOLECULAR BIOLOGY	0.16	TRENDS IN BIOCHEMICAL SCIENCES	0.711126	1.27423	50

## Sheet: S7 Fig
ChemEng
category	frac_pubs	journal_title	coauthors	circle_size	journal_size
POLYMER SCIENCE	0.104204	MACROMOLECULES	0.998584	2.58338	2783
MATERIALS SCIENCE, MULTIDISCIPLINARY	0.110954	LANGMUIR	0.945191	2.49444	2118
CHEMISTRY, MULTIDISCIPLINARY	0.110954	LANGMUIR	0.945191	1.66296	2118
CHEMISTRY, PHYSICAL	0.110954	LANGMUIR	0.945191	0.831481	2118
PHYSICS, ATOMIC, MOLECULAR & CHEMICAL	0.0819672	JOURNAL OF CHEMICAL PHYSICS	0.826087	2.47788	2013
ENGINEERING, CHEMICAL	0.0598131	INDUSTRIAL & ENGINEERING CHEMISTRY RESEARCH	0.839876	2.40411	1605
CHEMISTRY, PHYSICAL	0.0800654	JOURNAL OF PHYSICAL CHEMISTRY B	0.935488	2.31584	1224
CHEMISTRY, MULTIDISCIPLINARY	0.0893155	JOURNAL OF THE AMERICAN CHEMICAL SOCIETY	1.12703	2.30884	1198
PHYSICS, MULTIDISCIPLINARY	0.092161	PHYSICAL REVIEW LETTERS	1.03058	2.23123	944
PHYSICS, APPLIED	0.0751708	APPLIED PHYSICS LETTERS	1.3878	2.20762	878
CHEMISTRY, PHYSICAL	0.0623501	JOURNAL OF COLLOID AND INTERFACE SCIENCE	0.830652	2.19087	834
PHYSICS, CONDENSED MATTER	0.0477387	SURFACE SCIENCE	0.93704	2.17568	796
CHEMISTRY, PHYSICAL	0.0477387	SURFACE SCIENCE	0.93704	1.08784	796
POLYMER SCIENCE	0.0486111	POLYMER	0.93967	2.143	720
PHYSICS, CONDENSED MATTER	0.170769	PHYSICAL REVIEW B	1.06197	2.10969	650
MATERIALS SCIENCE, MULTIDISCIPLINARY	0.174923	CHEMISTRY OF MATERIALS	1.12411	2.10767	646
CHEMISTRY, PHYSICAL	0.174923	CHEMISTRY OF MATERIALS	1.12411	1.05384	646
PHYSICS, APPLIED	0.100683	JOURNAL OF APPLIED PHYSICS	1.14914	2.07592	586
PHYSICS, MATHEMATICAL	0.101124	PHYSICAL REVIEW E	0.796342	2.04566	534
PHYSICS, FLUIDS & PLASMAS	0.101124	PHYSICAL REVIEW E	0.796342	1.02283	534
MULTIDISCIPLINARY SCIENCES	0.147929	PROCEEDINGS OF THE NATIONAL ACADEMY OF SCIENCES OF THE UNITED STATES OF AMERICA	1.25719	2.02876	507
BIOPHYSICS	0.145709	BIOPHYSICAL JOURNAL	0.945536	2.02488	501
FOOD SCIENCE & TECHNOLOGY	0.072	BIOTECHNOLOGY PROGRESS	0.876731	2.02423	500
BIOTECHNOLOGY & APPLIED MICROBIOLOGY	0.072	BIOTECHNOLOGY PROGRESS	0.876731	1.01211	500
POLYMER SCIENCE	0.0623742	JOURNAL OF POLYMER SCIENCE PART B-POLYMER PHYSICS	0.932094	2.02227	497
POLYMER SCIENCE	0.0518672	JOURNAL OF APPLIED POLYMER SCIENCE	0.964826	2.01229	482
MULTIDISCIPLINARY SCIENCES	0.0989848	SCIENCE	1.66651	1.94662	394
MECHANICS	0.0514139	JOURNAL OF RHEOLOGY	0.795843	1.94246	389
PHYSICS, FLUIDS & PLASMAS	0.0539846	PHYSICS OF FLUIDS	0.710531	1.94246	389
MECHANICS	0.0539846	PHYSICS OF FLUIDS	0.710531	0.971231	389
NANOSCIENCE & NANOTECHNOLOGY	0.158824	ADVANCED MATERIALS	1.11422	1.89861	340
PHYSICS, CONDENSED MATTER	0.158824	ADVANCED MATERIALS	1.11422	1.58217	340
PHYSICS, APPLIED	0.158824	ADVANCED MATERIALS	1.11422	1.26574	340
MATERIALS SCIENCE, MULTIDISCIPLINARY	0.158824	ADVANCED MATERIALS	1.11422	0.949305	340
CHEMISTRY, MULTIDISCIPLINARY	0.158824	ADVANCED MATERIALS	1.11422	0.63287	340
CHEMISTRY, PHYSICAL	0.158824	ADVANCED MATERIALS	1.11422	0.316435	340
NANOSCIENCE & NANOTECHNOLOGY	0.0650155	JOURNAL OF PHYSICAL CHEMISTRY C	0.884223	1.8819	323
MATERIALS SCIENCE, MULTIDISCIPLINARY	0.0650155	JOURNAL OF PHYSICAL CHEMISTRY C	0.884223	1.2546	323
CHEMISTRY, PHYSICAL	0.0650155	JOURNAL OF PHYSICAL CHEMISTRY C	0.884223	0.627301	323
NANOSCIENCE & NANOTECHNOLOGY	0.153061	NANO LETTERS	1.22307	1.85126	294
PHYSICS, CONDENSED MATTER	0.153061	NANO LETTERS	1.22307	1.54272	294
PHYSICS, APPLIED	0.153061	NANO LETTERS	1.22307	1.23417	294
MATERIALS SCIENCE, MULTIDISCIPLINARY	0.153061	NANO LETTERS	1.22307	0.92563	294
CHEMISTRY, MULTIDISCIPLINARY	0.153061	NANO LETTERS	1.22307	0.617087	294
CHEMISTRY, PHYSICAL	0.153061	NANO LETTERS	1.22307	0.308543	294
CHEMISTRY, ANALYTICAL	0.118056	ANALYTICAL CHEMISTRY	1.05456	1.84454	288
BIOCHEMISTRY & MOLECULAR BIOLOGY	0.152672	BIOCHEMISTRY	1.1343	1.81373	262
BIOCHEMISTRY & MOLECULAR BIOLOGY	0.108949	JOURNAL OF BIOLOGICAL CHEMISTRY	1.24287	1.80745	257
MICROBIOLOGY	0.119048	APPLIED AND ENVIRONMENTAL MICROBIOLOGY	1.08446	1.80105	252
BIOTECHNOLOGY & APPLIED MICROBIOLOGY	0.119048	APPLIED AND ENVIRONMENTAL MICROBIOLOGY	1.08446	0.900525	252
MECHANICS	0.0794979	JOURNAL OF NON-NEWTONIAN FLUID MECHANICS	0.815143	1.7838	239
ENGINEERING, ELECTRICAL & ELECTRONIC	0.0572687	JOURNAL OF VACUUM SCIENCE & TECHNOLOGY B	1.3388	1.76702	227
NANOSCIENCE & NANOTECHNOLOGY	0.0572687	JOURNAL OF VACUUM SCIENCE & TECHNOLOGY B	1.3388	1.17801	227
PHYSICS, APPLIED	0.0572687	JOURNAL OF VACUUM SCIENCE & TECHNOLOGY B	1.3388	0.589006	227
PHYSICS, ATOMIC, MOLECULAR & CHEMICAL	0.166667	JOURNAL OF PHYSICAL CHEMISTRY A	0.989895	1.75976	222
CHEMISTRY, PHYSICAL	0.166667	JOURNAL OF PHYSICAL CHEMISTRY A	0.989895	0.879882	222
PHYSICS, ATOMIC, MOLECULAR & CHEMICAL	0.105991	CHEMICAL PHYSICS LETTERS	1.00349	1.75234	217
CHEMISTRY, PHYSICAL	0.105991	CHEMICAL PHYSICS LETTERS	1.00349	0.876172	217
MULTIDISCIPLINARY SCIENCES	0.125628	NATURE	1.41079	1.72414	199
CHEMISTRY, MULTIDISCIPLINARY	0.0543478	ANGEWANDTE CHEMIE-INTERNATIONAL EDITION	1.08501	1.69861	184
POLYMER SCIENCE	0.0852273	JOURNAL OF POLYMER SCIENCE PART A-POLYMER CHEMISTRY	0.917816	1.68413	176
MATERIALS SCIENCE, MULTIDISCIPLINARY	0.0568182	JOURNAL OF MATERIALS SCIENCE	0.915896	1.68413	176
MECHANICS	0.0971429	RHEOLOGICA ACTA	0.881746	1.68228	175
CHEMISTRY, MULTIDISCIPLINARY	0.08125	CHEMICAL COMMUNICATIONS	1.0251	1.65309	160
MATERIALS SCIENCE, COATINGS & FILMS	0.0632911	JOURNAL OF VACUUM SCIENCE & TECHNOLOGY A-VACUUM SURFACES AND FILMS	1.04203	1.64899	158
PHYSICS, APPLIED	0.0632911	JOURNAL OF VACUUM SCIENCE & TECHNOLOGY A-VACUUM SURFACES AND FILMS	1.04203	0.824496	158
MATERIALS SCIENCE, COATINGS & FILMS	0.0641026	THIN SOLID FILMS	1.07375	1.64484	156
PHYSICS, CONDENSED MATTER	0.0641026	THIN SOLID FILMS	1.07375	1.23363	156
PHYSICS, APPLIED	0.0641026	THIN SOLID FILMS	1.07375	0.822422	156
MATERIALS SCIENCE, MULTIDISCIPLINARY	0.0641026	THIN SOLID FILMS	1.07375	0.411211	156
ENVIRONMENTAL SCIENCES	0.0604027	APPLIED CATALYSIS A-GENERAL	0.906973	1.62989	149
CHEMISTRY, PHYSICAL	0.0604027	APPLIED CATALYSIS A-GENERAL	0.906973	0.814945	149
INSTRUMENTS & INSTRUMENTATION	0.0714286	REVIEW OF SCIENTIFIC INSTRUMENTS	1.12819	1.6096	140
PHYSICS, APPLIED	0.0714286	REVIEW OF SCIENTIFIC INSTRUMENTS	1.12819	0.804798	140
ELECTROCHEMISTRY	0.0735294	ELECTROCHEMICAL AND SOLID STATE LETTERS	1.28809	1.60015	136
MATERIALS SCIENCE, MULTIDISCIPLINARY	0.0735294	ELECTROCHEMICAL AND SOLID STATE LETTERS	1.28809	0.800077	136
MATERIALS SCIENCE, CERAMICS	0.0977444	JOURNAL OF NON-CRYSTALLINE SOLIDS	0.834913	1.59289	133
MATERIALS SCIENCE, MULTIDISCIPLINARY	0.0977444	JOURNAL OF NON-CRYSTALLINE SOLIDS	0.834913	0.796444	133
ENGINEERING, BIOMEDICAL	0.114754	JOURNAL OF BIOMEDICAL MATERIALS RESEARCH	1.14533	1.56477	122
MATERIALS SCIENCE, BIOMATERIALS	0.114754	JOURNAL OF BIOMEDICAL MATERIALS RESEARCH	1.14533	0.782385	122
ENGINEERING, BIOMEDICAL	0.0973451	ANNALS OF BIOMEDICAL ENGINEERING	1.02596	1.53981	113
CHEMISTRY, PHYSICAL	0.151786	COLLOIDS AND SURFACES A-PHYSICOCHEMICAL AND ENGINEERING ASPECTS	0.842081	1.53691	112
PHYSICS, ATOMIC, MOLECULAR & CHEMICAL	0.137615	PHYSICAL CHEMISTRY CHEMICAL PHYSICS	0.935097	1.52807	109
CHEMISTRY, PHYSICAL	0.137615	PHYSICAL CHEMISTRY CHEMICAL PHYSICS	0.935097	0.764035	109
PHARMACOLOGY & PHARMACY	0.0970874	JOURNAL OF CONTROLLED RELEASE	0.966925	1.50963	103
CHEMISTRY, MULTIDISCIPLINARY	0.0970874	JOURNAL OF CONTROLLED RELEASE	0.966925	0.754814	103
MATERIALS SCIENCE, COATINGS & FILMS	0.177083	JOURNAL OF VACUUM SCIENCE & TECHNOLOGY A	0.821539	1.4867	96
PHYSICS, APPLIED	0.177083	JOURNAL OF VACUUM SCIENCE & TECHNOLOGY A	0.821539	0.743352	96
BIOCHEMISTRY & MOLECULAR BIOLOGY	0.168421	JOURNAL OF MOLECULAR BIOLOGY	1.11864	1.48329	95
BIOCHEMICAL RESEARCH METHODS	0.157895	LAB ON A CHIP	1.11168	1.48329	95
NANOSCIENCE & NANOTECHNOLOGY	0.157895	LAB ON A CHIP	1.11168	0.988862	95
CHEMISTRY, MULTIDISCIPLINARY	0.157895	LAB ON A CHIP	1.11168	0.494431	95
PHARMACOLOGY & PHARMACY	0.0454545	PHARMACEUTICAL RESEARCH	1.02281	1.45836	88
CHEMISTRY, MULTIDISCIPLINARY	0.0454545	PHARMACEUTICAL RESEARCH	1.02281	0.729181	88
ENGINEERING, CHEMICAL	0.102273	POWDER TECHNOLOGY	0.859013	1.45836	88
METALLURGY & METALLURGICAL ENGINEERING	0.136364	METALLURGICAL AND MATERIALS TRANSACTIONS A-PHYSICAL METALLURGY AND MATERIALS SCIENCE	0.939206	1.45836	88
MATERIALS SCIENCE, MULTIDISCIPLINARY	0.136364	METALLURGICAL AND MATERIALS TRANSACTIONS A-PHYSICAL METALLURGY AND MATERIALS SCIENCE	0.939206	0.729181	88
MATERIALS SCIENCE, MULTIDISCIPLINARY	0.104651	JOURNAL OF MATERIALS CHEMISTRY	1.1164	1.45087	86
CHEMISTRY, PHYSICAL	0.104651	JOURNAL OF MATERIALS CHEMISTRY	1.1164	0.725437	86
ENERGY & FUELS	0.0588235	COMBUSTION AND FLAME	0.953928	1.44706	85
ENGINEERING, MULTIDISCIPLINARY	0.0588235	COMBUSTION AND FLAME	0.953928	1.0853	85
THERMODYNAMICS	0.0588235	COMBUSTION AND FLAME	0.953928	0.723532	85
ENGINEERING, CHEMICAL	0.0588235	COMBUSTION AND FLAME	0.953928	0.361766	85
BIOPHYSICS	0.144578	BIOCHEMICAL AND BIOPHYSICAL RESEARCH COMMUNICATIONS	1.11368	1.43931	83
BIOCHEMISTRY & MOLECULAR BIOLOGY	0.144578	BIOCHEMICAL AND BIOPHYSICAL RESEARCH COMMUNICATIONS	1.11368	0.719654	83
BIOLOGY	0.164557	JOURNAL OF THEORETICAL BIOLOGY	0.775913	1.42322	79
MATHEMATICAL & COMPUTATIONAL BIOLOGY	0.164557	JOURNAL OF THEORETICAL BIOLOGY	0.775913	0.71161	79
BIOCHEMICAL RESEARCH METHODS	0.102564	JOURNAL OF CHROMATOGRAPHY A	0.880849	1.41907	78
CHEMISTRY, ANALYTICAL	0.102564	JOURNAL OF CHROMATOGRAPHY A	0.880849	0.709535	78
ENGINEERING, CHEMICAL	0.0657895	JOURNAL OF SUPERCRITICAL FLUIDS	0.948306	1.41061	76
CHEMISTRY, PHYSICAL	0.0657895	JOURNAL OF SUPERCRITICAL FLUIDS	0.948306	0.705305	76
CHEMISTRY, ORGANIC	0.0921053	JOURNAL OF ORGANIC CHEMISTRY	1.14029	1.41061	76
ENERGY & FUELS	0.0789474	ENERGY & FUELS	0.889491	1.41061	76
ENGINEERING, CHEMICAL	0.0789474	ENERGY & FUELS	0.889491	0.705305	76
CHEMISTRY, APPLIED	0.0526316	CATALYSIS TODAY	0.942087	1.41061	76
ENGINEERING, CHEMICAL	0.0526316	CATALYSIS TODAY	0.942087	0.940407	76
CHEMISTRY, PHYSICAL	0.0526316	CATALYSIS TODAY	0.942087	0.470203	76
ENGINEERING, ENVIRONMENTAL	0.0821918	APPLIED CATALYSIS B-ENVIRONMENTAL	0.819052	1.39749	73
ENGINEERING, CHEMICAL	0.0821918	APPLIED CATALYSIS B-ENVIRONMENTAL	0.819052	0.931661	73
CHEMISTRY, PHYSICAL	0.0821918	APPLIED CATALYSIS B-ENVIRONMENTAL	0.819052	0.465831	73
BIOCHEMICAL RESEARCH METHODS	0.140845	BIOCONJUGATE CHEMISTRY	1.134	1.38844	71
CHEMISTRY, ORGANIC	0.140845	BIOCONJUGATE CHEMISTRY	1.134	1.04133	71
BIOCHEMISTRY & MOLECULAR BIOLOGY	0.140845	BIOCONJUGATE CHEMISTRY	1.134	0.694222	71
CHEMISTRY, MULTIDISCIPLINARY	0.140845	BIOCONJUGATE CHEMISTRY	1.134	0.347111	71
ENGINEERING, BIOMEDICAL	0.171429	JOURNAL OF BIOMATERIALS SCIENCE-POLYMER EDITION	1.1576	1.38382	70
MATERIALS SCIENCE, BIOMATERIALS	0.171429	JOURNAL OF BIOMATERIALS SCIENCE-POLYMER EDITION	1.1576	0.922549	70
POLYMER SCIENCE	0.171429	JOURNAL OF BIOMATERIALS SCIENCE-POLYMER EDITION	1.1576	0.461275	70
BIOTECHNOLOGY & APPLIED MICROBIOLOGY	0.0857143	BIOTECHNOLOGY LETTERS	1.01428	1.38382	70
NANOSCIENCE & NANOTECHNOLOGY	0.147059	ACS NANO	1.15371	1.37438	68
MATERIALS SCIENCE, MULTIDISCIPLINARY	0.147059	ACS NANO	1.15371	1.03079	68
CHEMISTRY, MULTIDISCIPLINARY	0.147059	ACS NANO	1.15371	0.687191	68
CHEMISTRY, PHYSICAL	0.147059	ACS NANO	1.15371	0.343595	68
BIOTECHNOLOGY & APPLIED MICROBIOLOGY	0.102941	ENZYME AND MICROBIAL TECHNOLOGY	0.927191	1.37438	68
BIOCHEMICAL RESEARCH METHODS	0.0923077	ANALYTICAL BIOCHEMISTRY	1.11632	1.35969	65
CHEMISTRY, ANALYTICAL	0.0923077	ANALYTICAL BIOCHEMISTRY	1.11632	0.906457	65
BIOCHEMISTRY & MOLECULAR BIOLOGY	0.0923077	ANALYTICAL BIOCHEMISTRY	1.11632	0.453228	65
POLYMER SCIENCE	0.133333	MACROMOLECULAR RAPID COMMUNICATIONS	0.99302	1.33361	60
METALLURGY & METALLURGICAL ENGINEERING	0.172414	ACTA MATERIALIA	1.03319	1.32257	58
MATERIALS SCIENCE, MULTIDISCIPLINARY	0.172414	ACTA MATERIALIA	1.03319	0.661285	58
HEMATOLOGY	0.140351	BLOOD	1.6227	1.31691	57
BIOCHEMISTRY & MOLECULAR BIOLOGY	0.107143	NUCLEIC ACIDS RESEARCH	1.13947	1.31114	56
PHYSICS, CONDENSED MATTER	0.12963	JOURNAL OF PHYSICS-CONDENSED MATTER	1.06047	1.2993	54
ENGINEERING, ELECTRICAL & ELECTRONIC	0.0740741	JOURNAL OF MICROMECHANICS AND MICROENGINEERING	0.929334	1.2993	54
INSTRUMENTS & INSTRUMENTATION	0.0740741	JOURNAL OF MICROMECHANICS AND MICROENGINEERING	0.929334	1.03944	54
NANOSCIENCE & NANOTECHNOLOGY	0.0740741	JOURNAL OF MICROMECHANICS AND MICROENGINEERING	0.929334	0.779577	54
MECHANICS	0.0740741	JOURNAL OF MICROMECHANICS AND MICROENGINEERING	0.929334	0.519718	54
MATERIALS SCIENCE, MULTIDISCIPLINARY	0.0740741	JOURNAL OF MICROMECHANICS AND MICROENGINEERING	0.929334	0.259859	54
PHYSICS, MULTIDISCIPLINARY	0.0740741	EUROPHYSICS LETTERS	1.10195	1.2993	54
CHEMISTRY, MULTIDISCIPLINARY	0.132075	JOURNAL OF THE CHEMICAL SOCIETY-CHEMICAL COMMUNICATIONS	1.03718	1.29321	53
CHEMISTRY, INORGANIC & NUCLEAR	0.169811	ORGANOMETALLICS	1.03662	1.29321	53
CHEMISTRY, ORGANIC	0.169811	ORGANOMETALLICS	1.03662	0.646603	53
CHEMISTRY, APPLIED	0.0566038	TOPICS IN CATALYSIS	0.802721	1.29321	53
CHEMISTRY, PHYSICAL	0.0566038	TOPICS IN CATALYSIS	0.802721	0.646603	53
CHEMISTRY, INORGANIC & NUCLEAR	0.156863	INORGANIC CHEMISTRY	1.26403	1.28068	51
ENGINEERING, BIOMEDICAL	0.08	JOURNAL OF BIOMECHANICS	1.08753	1.27423	50
BIOPHYSICS	0.08	JOURNAL OF BIOMECHANICS	1.08753	0.637114	50
NANOSCIENCE & NANOTECHNOLOGY	0.1	SMALL	1.03612	1.27423	50
PHYSICS, CONDENSED MATTER	0.1	SMALL	1.03612	1.06186	50
PHYSICS, APPLIED	0.1	SMALL	1.03612	0.849485	50
MATERIALS SCIENCE, MULTIDISCIPLINARY	0.1	SMALL	1.03612	0.637114	50
CHEMISTRY, MULTIDISCIPLINARY	0.1	SMALL	1.03612	0.424743	50
CHEMISTRY, PHYSICAL	0.1	SMALL	1.03612	0.212371	50

## Sheet: S8 Fig
category	frac_pubs	journal_title	coauthors	circle_size	journal_size
CHEMISTRY, MULTIDISCIPLINARY	0.0753674	JOURNAL OF THE AMERICAN CHEMICAL SOCIETY	1.00817	3.19322	18098
PHYSICS, ATOMIC, MOLECULAR & CHEMICAL	0.0604666	JOURNAL OF CHEMICAL PHYSICS	0.828571	2.9779	9344
CHEMISTRY, INORGANIC & NUCLEAR	0.0955789	INORGANIC CHEMISTRY	1.03067	2.75752	4750
BIOCHEMISTRY & MOLECULAR BIOLOGY	0.166202	BIOCHEMISTRY	1.03884	2.72571	4308
PHYSICS, ATOMIC, MOLECULAR & CHEMICAL	0.0620573	CHEMICAL PHYSICS LETTERS	0.877492	2.60402	2965
CHEMISTRY, PHYSICAL	0.0620573	CHEMICAL PHYSICS LETTERS	0.877492	1.30201	2965
CHEMISTRY, PHYSICAL	0.0624768	JOURNAL OF PHYSICAL CHEMISTRY	0.912638	2.57219	2689
CHEMISTRY, PHYSICAL	0.111489	JOURNAL OF PHYSICAL CHEMISTRY B	0.907711	2.56694	2646
MULTIDISCIPLINARY SCIENCES	0.141722	PROCEEDINGS OF THE NATIONAL ACADEMY OF SCIENCES OF THE UNITED STATES OF AMERICA	1.12085	2.53407	2392
CHEMISTRY, ANALYTICAL	0.104578	ANALYTICAL CHEMISTRY	0.874502	2.53257	2381
CHEMISTRY, ORGANIC	0.0480442	TETRAHEDRON LETTERS	0.774344	2.52858	2352
PHYSICS, ATOMIC, MOLECULAR & CHEMICAL	0.0884161	JOURNAL OF PHYSICAL CHEMISTRY A	0.853394	2.49398	2115
CHEMISTRY, PHYSICAL	0.0884161	JOURNAL OF PHYSICAL CHEMISTRY A	0.853394	1.24699	2115
CHEMISTRY, ORGANIC	0.0574456	ORGANIC LETTERS	0.706938	2.44019	1793
CHEMISTRY, INORGANIC & NUCLEAR	0.0621437	ORGANOMETALLICS	0.899642	2.43302	1754
CHEMISTRY, ORGANIC	0.0621437	ORGANOMETALLICS	0.899642	1.21651	1754
PHYSICS, CONDENSED MATTER	0.0791946	PHYSICAL REVIEW B	1.16437	2.37989	1490
CHEMISTRY, MULTIDISCIPLINARY	0.0686141	ANGEWANDTE CHEMIE-INTERNATIONAL EDITION	0.86823	2.37593	1472
MULTIDISCIPLINARY SCIENCES	0.0871972	SCIENCE	1.41504	2.3699	1445
MATERIALS SCIENCE, MULTIDISCIPLINARY	0.126234	LANGMUIR	0.924593	2.36376	1418
CHEMISTRY, PHYSICAL	0.126234	LANGMUIR	0.924593	1.57584	1418
CHEMISTRY, MULTIDISCIPLINARY	0.126234	LANGMUIR	0.924593	0.787919	1418
PHYSICS, MULTIDISCIPLINARY	0.0700829	PHYSICAL REVIEW LETTERS	1.43858	2.34215	1327
MATERIALS SCIENCE, MULTIDISCIPLINARY	0.113323	CHEMISTRY OF MATERIALS	1.09962	2.33696	1306
CHEMISTRY, PHYSICAL	0.113323	CHEMISTRY OF MATERIALS	1.09962	1.16848	1306
CHEMISTRY, MULTIDISCIPLINARY	0.0743565	CHEMICAL COMMUNICATIONS	0.904901	2.26558	1049
BIOCHEMISTRY & MOLECULAR BIOLOGY	0.106796	JOURNAL OF MOLECULAR BIOLOGY	1.0377	2.22531	927
PHYSICS, APPLIED	0.067027	APPLIED PHYSICS LETTERS	1.20886	2.22461	925
PHYSICS, CONDENSED MATTER	0.121131	SURFACE SCIENCE	0.9266	2.15324	743
CHEMISTRY, PHYSICAL	0.121131	SURFACE SCIENCE	0.9266	1.07662	743
BIOPHYSICS	0.117568	BIOPHYSICAL JOURNAL	0.896682	2.15192	740
PHYSICS, APPLIED	0.0729023	NANO LETTERS	1.06432	2.14615	727
PHYSICS, CONDENSED MATTER	0.0729023	NANO LETTERS	1.06432	1.78846	727
NANOSCIENCE & NANOTECHNOLOGY	0.0729023	NANO LETTERS	1.06432	1.43077	727
MATERIALS SCIENCE, MULTIDISCIPLINARY	0.0729023	NANO LETTERS	1.06432	1.07308	727
CHEMISTRY, PHYSICAL	0.0729023	NANO LETTERS	1.06432	0.715384	727
CHEMISTRY, MULTIDISCIPLINARY	0.0729023	NANO LETTERS	1.06432	0.357692	727
CHEMISTRY, ORGANIC	0.0621387	TETRAHEDRON	0.924067	2.13008	692
MULTIDISCIPLINARY SCIENCES	0.0987842	NATURE	1.58558	2.11367	658
PHYSICS, ATOMIC, MOLECULAR & CHEMICAL	0.0876369	CHEMICAL PHYSICS	0.859125	2.10413	639
CHEMISTRY, PHYSICAL	0.0876369	CHEMICAL PHYSICS	0.859125	1.05206	639
OPTICS	0.0757315	PHYSICAL REVIEW A	0.794164	2.07313	581
PHYSICS, ATOMIC, MOLECULAR & CHEMICAL	0.0757315	PHYSICAL REVIEW A	0.794164	1.03657	581
PHYSICS, APPLIED	0.0534483	ADVANCED MATERIALS	1.07689	2.07257	580
PHYSICS, CONDENSED MATTER	0.0534483	ADVANCED MATERIALS	1.07689	1.72714	580
NANOSCIENCE & NANOTECHNOLOGY	0.0534483	ADVANCED MATERIALS	1.07689	1.38171	580
MATERIALS SCIENCE, MULTIDISCIPLINARY	0.0534483	ADVANCED MATERIALS	1.07689	1.03629	580
CHEMISTRY, PHYSICAL	0.0534483	ADVANCED MATERIALS	1.07689	0.690857	580
CHEMISTRY, MULTIDISCIPLINARY	0.0534483	ADVANCED MATERIALS	1.07689	0.345428	580
NANOSCIENCE & NANOTECHNOLOGY	0.13371	JOURNAL OF PHYSICAL CHEMISTRY C	0.90545	2.04382	531
MATERIALS SCIENCE, MULTIDISCIPLINARY	0.13371	JOURNAL OF PHYSICAL CHEMISTRY C	0.90545	1.36255	531
CHEMISTRY, PHYSICAL	0.13371	JOURNAL OF PHYSICAL CHEMISTRY C	0.90545	0.681274	531
CHEMISTRY, MEDICINAL	0.0622407	JOURNAL OF MEDICINAL CHEMISTRY	1.49543	2.01229	482
BIOCHEMISTRY & MOLECULAR BIOLOGY	0.14442	NUCLEIC ACIDS RESEARCH	0.994731	1.99494	457
CHEMISTRY, INORGANIC & NUCLEAR	0.115909	INORGANICA CHIMICA ACTA	0.973254	1.98259	440
CRYSTALLOGRAPHY	0.100503	ACTA CRYSTALLOGRAPHICA SECTION C-CRYSTAL STRUCTURE COMMUNICATIONS	0.884966	1.94991	398
CHEMISTRY, MEDICINAL	0.129973	BIOORGANIC & MEDICINAL CHEMISTRY LETTERS	1.09804	1.93226	377
CHEMISTRY, ORGANIC	0.129973	BIOORGANIC & MEDICINAL CHEMISTRY LETTERS	1.09804	0.966128	377
PHYSICS, APPLIED	0.0652174	JOURNAL OF APPLIED PHYSICS	1.11226	1.92439	368
BIOCHEMICAL RESEARCH METHODS	0.0549451	JOURNAL OF MAGNETIC RESONANCE	0.937045	1.92083	364
SPECTROSCOPY	0.0549451	JOURNAL OF MAGNETIC RESONANCE	0.937045	1.28055	364
PHYSICS, ATOMIC, MOLECULAR & CHEMICAL	0.0549451	JOURNAL OF MAGNETIC RESONANCE	0.937045	0.640275	364
EDUCATION, SCIENTIFIC DISCIPLINES	0.160221	JOURNAL OF CHEMICAL EDUCATION	0.709415	1.91903	362
CHEMISTRY, MULTIDISCIPLINARY	0.160221	JOURNAL OF CHEMICAL EDUCATION	0.709415	0.959516	362
BIOCHEMISTRY & MOLECULAR BIOLOGY	0.132353	PROTEIN SCIENCE	0.958107	1.89861	340
BIOPHYSICS	0.114458	BIOCHEMICAL AND BIOPHYSICAL RESEARCH COMMUNICATIONS	1.01824	1.89085	332
BIOCHEMISTRY & MOLECULAR BIOLOGY	0.114458	BIOCHEMICAL AND BIOPHYSICAL RESEARCH COMMUNICATIONS	1.01824	0.945427	332
BIOCHEMICAL RESEARCH METHODS	0.10356	ANALYTICAL BIOCHEMISTRY	0.959255	1.86747	309
CHEMISTRY, ANALYTICAL	0.10356	ANALYTICAL BIOCHEMISTRY	0.959255	1.24498	309
BIOCHEMISTRY & MOLECULAR BIOLOGY	0.10356	ANALYTICAL BIOCHEMISTRY	0.959255	0.62249	309
BIOPHYSICS	0.0697674	BIOCHIMICA ET BIOPHYSICA ACTA	1.03779	1.85892	301
BIOCHEMISTRY & MOLECULAR BIOLOGY	0.0697674	BIOCHIMICA ET BIOPHYSICA ACTA	1.03779	0.929462	301
BIOPHYSICS	0.149153	ARCHIVES OF BIOCHEMISTRY AND BIOPHYSICS	0.933044	1.85237	295
BIOCHEMISTRY & MOLECULAR BIOLOGY	0.149153	ARCHIVES OF BIOCHEMISTRY AND BIOPHYSICS	0.933044	0.926183	295
CRYSTALLOGRAPHY	0.0515464	POLYHEDRON	0.96695	1.84792	291
CHEMISTRY, INORGANIC & NUCLEAR	0.0515464	POLYHEDRON	0.96695	0.92396	291
SPECTROSCOPY	0.104895	INTERNATIONAL JOURNAL OF MASS SPECTROMETRY AND ION PROCESSES	1.00976	1.84227	286
PHYSICS, ATOMIC, MOLECULAR & CHEMICAL	0.104895	INTERNATIONAL JOURNAL OF MASS SPECTROMETRY AND ION PROCESSES	1.00976	0.921137	286
MATERIALS SCIENCE, MULTIDISCIPLINARY	0.0666667	JOURNAL OF MATERIALS CHEMISTRY	1.05441	1.84113	285
CHEMISTRY, PHYSICAL	0.0666667	JOURNAL OF MATERIALS CHEMISTRY	1.05441	0.920567	285
INSTRUMENTS & INSTRUMENTATION	0.101754	APPLIED SPECTROSCOPY	0.868539	1.84113	285
SPECTROSCOPY	0.101754	APPLIED SPECTROSCOPY	0.868539	0.920567	285
SPECTROSCOPY	0.143369	INTERNATIONAL JOURNAL OF MASS SPECTROMETRY	0.901174	1.8342	279
PHYSICS, ATOMIC, MOLECULAR & CHEMICAL	0.143369	INTERNATIONAL JOURNAL OF MASS SPECTROMETRY	0.901174	0.917102	279
MICROBIOLOGY	0.161654	JOURNAL OF BACTERIOLOGY	0.979279	1.81866	266
PHYSICS, ATOMIC, MOLECULAR & CHEMICAL	0.106719	PHYSICAL CHEMISTRY CHEMICAL PHYSICS	0.875703	1.80234	253
CHEMISTRY, PHYSICAL	0.106719	PHYSICAL CHEMISTRY CHEMICAL PHYSICS	0.875703	0.90117	253
CHEMISTRY, ANALYTICAL	0.114625	ANALYTICA CHIMICA ACTA	0.791687	1.80234	253
CHEMISTRY, MEDICINAL	0.1	BIOORGANIC & MEDICINAL CHEMISTRY	1.12448	1.78516	240
CHEMISTRY, ORGANIC	0.1	BIOORGANIC & MEDICINAL CHEMISTRY	1.12448	1.19011	240
BIOCHEMISTRY & MOLECULAR BIOLOGY	0.1	BIOORGANIC & MEDICINAL CHEMISTRY	1.12448	0.595053	240
ENGINEERING, ENVIRONMENTAL	0.180995	ENVIRONMENTAL SCIENCE & TECHNOLOGY	1.07943	1.75829	221
ENVIRONMENTAL SCIENCES	0.180995	ENVIRONMENTAL SCIENCE & TECHNOLOGY	1.07943	0.879147	221
CHEMISTRY, INORGANIC & NUCLEAR	0.0985915	DALTON TRANSACTIONS	0.912663	1.74628	213
BIOCHEMICAL RESEARCH METHODS	0.108491	JOURNAL OF CHROMATOGRAPHY A	0.7977	1.74475	212
CHEMISTRY, ANALYTICAL	0.108491	JOURNAL OF CHROMATOGRAPHY A	0.7977	0.872376	212
CHEMISTRY, INORGANIC & NUCLEAR	0.0985222	JOURNAL OF THE CHEMICAL SOCIETY-DALTON TRANSACTIONS	1.1409	1.73062	203
BIOCHEMICAL RESEARCH METHODS	0.13198	BIOCONJUGATE CHEMISTRY	1.00063	1.72085	197
CHEMISTRY, ORGANIC	0.13198	BIOCONJUGATE CHEMISTRY	1.00063	1.29064	197
BIOCHEMISTRY & MOLECULAR BIOLOGY	0.13198	BIOCONJUGATE CHEMISTRY	1.00063	0.860425	197
CHEMISTRY, MULTIDISCIPLINARY	0.13198	BIOCONJUGATE CHEMISTRY	1.00063	0.430212	197
BIOPHYSICS	0.158974	BIOPOLYMERS	0.852061	1.71753	195
BIOCHEMISTRY & MOLECULAR BIOLOGY	0.158974	BIOPOLYMERS	0.852061	0.858763	195
CELL BIOLOGY	0.0947368	FEBS LETTERS	1.10436	1.70907	190
BIOPHYSICS	0.0947368	FEBS LETTERS	1.10436	1.13938	190
BIOCHEMISTRY & MOLECULAR BIOLOGY	0.0947368	FEBS LETTERS	1.10436	0.569688	190
BIOCHEMICAL RESEARCH METHODS	0.0852273	RAPID COMMUNICATIONS IN MASS SPECTROMETRY	0.949836	1.68413	176
SPECTROSCOPY	0.0852273	RAPID COMMUNICATIONS IN MASS SPECTROMETRY	0.949836	1.12276	176
CHEMISTRY, ANALYTICAL	0.0852273	RAPID COMMUNICATIONS IN MASS SPECTROMETRY	0.949836	0.561378	176
CHEMISTRY, ORGANIC	0.0823529	SYNLETT	0.731037	1.67284	170
CELL BIOLOGY	0.170588	NATURE STRUCTURAL BIOLOGY	0.942304	1.67284	170
BIOPHYSICS	0.170588	NATURE STRUCTURAL BIOLOGY	0.942304	1.11522	170
BIOCHEMISTRY & MOLECULAR BIOLOGY	0.170588	NATURE STRUCTURAL BIOLOGY	0.942304	0.557612	170
CHEMISTRY, MULTIDISCIPLINARY	0.0473373	JOURNAL OF COMPUTATIONAL CHEMISTRY	0.81745	1.67092	169
CHEMISTRY, MULTIDISCIPLINARY	0.0705128	ISRAEL JOURNAL OF CHEMISTRY	0.839429	1.64484	156
PHYSICS, APPLIED	0.0878378	ADVANCED FUNCTIONAL MATERIALS	1.19598	1.6277	148
PHYSICS, CONDENSED MATTER	0.0878378	ADVANCED FUNCTIONAL MATERIALS	1.19598	1.35641	148
NANOSCIENCE & NANOTECHNOLOGY	0.0878378	ADVANCED FUNCTIONAL MATERIALS	1.19598	1.08513	148
MATERIALS SCIENCE, MULTIDISCIPLINARY	0.0878378	ADVANCED FUNCTIONAL MATERIALS	1.19598	0.813848	148
CHEMISTRY, PHYSICAL	0.0878378	ADVANCED FUNCTIONAL MATERIALS	1.19598	0.542565	148
CHEMISTRY, MULTIDISCIPLINARY	0.0878378	ADVANCED FUNCTIONAL MATERIALS	1.19598	0.271283	148
CHEMISTRY, INORGANIC & NUCLEAR	0.14966	JOURNAL OF BIOLOGICAL INORGANIC CHEMISTRY	1.03867	1.62549	147
BIOCHEMISTRY & MOLECULAR BIOLOGY	0.14966	JOURNAL OF BIOLOGICAL INORGANIC CHEMISTRY	1.03867	0.812744	147
CELL BIOLOGY	0.150685	STRUCTURE	1.10995	1.62326	146
BIOPHYSICS	0.150685	STRUCTURE	1.10995	1.08218	146
BIOCHEMISTRY & MOLECULAR BIOLOGY	0.150685	STRUCTURE	1.10995	0.541088	146
SPECTROSCOPY	0.138889	ORGANIC MASS SPECTROMETRY	0.945198	1.61877	144
CHEMISTRY, ORGANIC	0.138889	ORGANIC MASS SPECTROMETRY	0.945198	0.809386	144
BIOCHEMICAL RESEARCH METHODS	0.0492958	ELECTROPHORESIS	0.950057	1.61422	142
CHEMISTRY, ANALYTICAL	0.0492958	ELECTROPHORESIS	0.950057	0.807108	142
ENGINEERING, CHEMICAL	0.0851064	CHEMICAL & ENGINEERING NEWS	0.86984	1.61191	141
CHEMISTRY, MULTIDISCIPLINARY	0.0851064	CHEMICAL & ENGINEERING NEWS	0.86984	0.805957	141
CELL BIOLOGY	0.0851064	CELL	1.25006	1.61191	141
BIOCHEMISTRY & MOLECULAR BIOLOGY	0.0851064	CELL	1.25006	0.805957	141
BIOPHYSICS	0.101449	PROTEINS-STRUCTURE FUNCTION AND BIOINFORMATICS	3.97981	1.60491	138
BIOCHEMISTRY & MOLECULAR BIOLOGY	0.101449	PROTEINS-STRUCTURE FUNCTION AND BIOINFORMATICS	3.97981	0.802455	138
BIOCHEMICAL RESEARCH METHODS	0.125926	JOURNAL OF MASS SPECTROMETRY	0.886353	1.59775	135
SPECTROSCOPY	0.125926	JOURNAL OF MASS SPECTROMETRY	0.886353	1.06517	135
CHEMISTRY, ANALYTICAL	0.125926	JOURNAL OF MASS SPECTROMETRY	0.886353	0.532583	135
BIOCHEMISTRY & MOLECULAR BIOLOGY	0.142857	RNA-A PUBLICATION OF THE RNA SOCIETY	0.7802	1.59289	133
POLYMER SCIENCE	0.0483871	BIOMACROMOLECULES	0.949853	1.57007	124
CHEMISTRY, ORGANIC	0.0483871	BIOMACROMOLECULES	0.949853	1.04671	124
BIOCHEMISTRY & MOLECULAR BIOLOGY	0.0483871	BIOMACROMOLECULES	0.949853	0.523355	124
CHEMISTRY, MULTIDISCIPLINARY	0.0487805	CANADIAN JOURNAL OF CHEMISTRY-REVUE CANADIENNE DE CHIMIE	0.897063	1.56743	123
CHEMISTRY, ANALYTICAL	0.132231	ANALYST	0.850661	1.56209	121
PHYSICS, APPLIED	0.116667	SMALL	1.02858	1.55939	120
PHYSICS, CONDENSED MATTER	0.116667	SMALL	1.02858	1.29949	120
NANOSCIENCE & NANOTECHNOLOGY	0.116667	SMALL	1.02858	1.03959	120
MATERIALS SCIENCE, MULTIDISCIPLINARY	0.116667	SMALL	1.02858	0.779693	120
CHEMISTRY, PHYSICAL	0.116667	SMALL	1.02858	0.519795	120
CHEMISTRY, MULTIDISCIPLINARY	0.116667	SMALL	1.02858	0.259898	120
PHYSICS, ATOMIC, MOLECULAR & CHEMICAL	0.0762712	CHEMPHYSCHEM	0.925534	1.55391	118
CHEMISTRY, PHYSICAL	0.0762712	CHEMPHYSCHEM	0.925534	0.776956	118
CHEMISTRY, MEDICINAL	0.135593	CHEMBIOCHEM	0.941534	1.55391	118
BIOCHEMISTRY & MOLECULAR BIOLOGY	0.135593	CHEMBIOCHEM	0.941534	0.776956	118
CHEMISTRY, PHYSICAL	0.0689655	FARADAY DISCUSSIONS	1.3351	1.54834	116
ONCOLOGY	0.130435	CANCER RESEARCH	1.68996	1.54552	115
BIOTECHNOLOGY & APPLIED MICROBIOLOGY	0.0900901	BIOTECHNOLOGY AND BIOENGINEERING	0.828384	1.53399	111
SPECTROSCOPY	0.145455	JOURNAL OF BIOMOLECULAR NMR	0.947028	1.53104	110
BIOCHEMISTRY & MOLECULAR BIOLOGY	0.145455	JOURNAL OF BIOMOLECULAR NMR	0.947028	0.765522	110
NANOSCIENCE & NANOTECHNOLOGY	0.0673077	ACS NANO	0.996814	1.51278	104
MATERIALS SCIENCE, MULTIDISCIPLINARY	0.0673077	ACS NANO	0.996814	1.13458	104
CHEMISTRY, PHYSICAL	0.0673077	ACS NANO	0.996814	0.756388	104
CHEMISTRY, MULTIDISCIPLINARY	0.0673077	ACS NANO	0.996814	0.378194	104
BIOPHYSICS	0.0485437	PROTEINS-STRUCTURE FUNCTION AND GENETICS	1.22752	1.50963	103
BIOCHEMISTRY & MOLECULAR BIOLOGY	0.0485437	PROTEINS-STRUCTURE FUNCTION AND GENETICS	1.22752	0.754814	103
PHYSICS, APPLIED	0.0582524	NATURE MATERIALS	1.38987	1.50963	103
PHYSICS, CONDENSED MATTER	0.0582524	NATURE MATERIALS	1.38987	1.13222	103
MATERIALS SCIENCE, MULTIDISCIPLINARY	0.0582524	NATURE MATERIALS	1.38987	0.754814	103
CHEMISTRY, PHYSICAL	0.0582524	NATURE MATERIALS	1.38987	0.377407	103
BIOLOGY	0.0990099	PROCEEDINGS OF THE NATIONAL ACADEMY OF SCIENCES OF THE UNITED STATES OF AMERICA-BIOLOGICAL SCIENCES	1.2678	1.50324	101
BIOCHEMISTRY & MOLECULAR BIOLOGY	0.07	BIOCHEMICAL JOURNAL	1.19282	1.5	100
BIOCHEMICAL RESEARCH METHODS	0.09	JOURNAL OF PROTEOME RESEARCH	1.13126	1.5	100
CHEMISTRY, MULTIDISCIPLINARY	0.0515464	PURE AND APPLIED CHEMISTRY	0.867228	1.49008	97
TOXICOLOGY	0.0625	CHEMICAL RESEARCH IN TOXICOLOGY	1.08473	1.4867	96
CHEMISTRY, MEDICINAL	0.0625	CHEMICAL RESEARCH IN TOXICOLOGY	1.08473	0.991136	96
CHEMISTRY, MULTIDISCIPLINARY	0.0625	CHEMICAL RESEARCH IN TOXICOLOGY	1.08473	0.495568	96
METALLURGY & METALLURGICAL ENGINEERING	0.0842105	JOURNAL OF ALLOYS AND COMPOUNDS	0.86433	1.48329	95
MATERIALS SCIENCE, MULTIDISCIPLINARY	0.0842105	JOURNAL OF ALLOYS AND COMPOUNDS	0.86433	0.988862	95
CHEMISTRY, PHYSICAL	0.0842105	JOURNAL OF ALLOYS AND COMPOUNDS	0.86433	0.494431	95
CHEMISTRY, ORGANIC	0.178947	HETEROCYCLES	0.804694	1.48329	95
CHEMISTRY, PHYSICAL	0.0967742	JOURNAL OF PHOTOCHEMISTRY AND PHOTOBIOLOGY A-CHEMISTRY	0.920938	1.47636	93
CHEMISTRY, ANALYTICAL	0.0752688	TALANTA	0.916351	1.47636	93
CHEMISTRY, ORGANIC	0.139785	ORGANIC & BIOMOLECULAR CHEMISTRY	0.74312	1.47636	93
CRYSTALLOGRAPHY	0.0769231	ACTA CRYSTALLOGRAPHICA SECTION D-BIOLOGICAL CRYSTALLOGRAPHY	0.991144	1.46928	91
BIOCHEMICAL RESEARCH METHODS	0.0769231	ACTA CRYSTALLOGRAPHICA SECTION D-BIOLOGICAL CRYSTALLOGRAPHY	0.991144	1.10196	91
BIOPHYSICS	0.0769231	ACTA CRYSTALLOGRAPHICA SECTION D-BIOLOGICAL CRYSTALLOGRAPHY	0.991144	0.734641	91
BIOCHEMISTRY & MOLECULAR BIOLOGY	0.0769231	ACTA CRYSTALLOGRAPHICA SECTION D-BIOLOGICAL CRYSTALLOGRAPHY	0.991144	0.36732	91
MATERIALS SCIENCE, COATINGS & FILMS	0.10989	JOURNAL OF VACUUM SCIENCE & TECHNOLOGY A-VACUUM SURFACES AND FILMS	1.08329	1.46928	91
PHYSICS, APPLIED	0.10989	JOURNAL OF VACUUM SCIENCE & TECHNOLOGY A-VACUUM SURFACES AND FILMS	1.08329	0.734641	91
ENGINEERING, ELECTRICAL & ELECTRONIC	0.133333	JOURNAL OF VACUUM SCIENCE & TECHNOLOGY B	1.20897	1.46568	90
PHYSICS, APPLIED	0.133333	JOURNAL OF VACUUM SCIENCE & TECHNOLOGY B	1.20897	0.977121	90
NANOSCIENCE & NANOTECHNOLOGY	0.133333	JOURNAL OF VACUUM SCIENCE & TECHNOLOGY B	1.20897	0.488561	90
OPTICS	0.11236	JOURNAL OF LUMINESCENCE	0.80864	1.46204	89
OPTICS	0.0568182	APPLIED OPTICS	0.963054	1.45836	88
PHYSICS, APPLIED	0.149425	NANOTECHNOLOGY	1.12344	1.45464	87
NANOSCIENCE & NANOTECHNOLOGY	0.149425	NANOTECHNOLOGY	1.12344	0.96976	87
MATERIALS SCIENCE, MULTIDISCIPLINARY	0.149425	NANOTECHNOLOGY	1.12344	0.48488	87
BIOCHEMISTRY & MOLECULAR BIOLOGY	0.127907	EUROPEAN JOURNAL OF BIOCHEMISTRY	1.17695	1.45087	86
CHEMISTRY, ORGANIC	0.0588235	JOURNAL OF THE CHEMICAL SOCIETY-PERKIN TRANSACTIONS 2	1.01482	1.44706	85
CHEMISTRY, PHYSICAL	0.0588235	JOURNAL OF THE CHEMICAL SOCIETY-PERKIN TRANSACTIONS 2	1.01482	0.723532	85
METEOROLOGY & ATMOSPHERIC SCIENCES	0.0595238	ATMOSPHERIC CHEMISTRY AND PHYSICS	2.22256	1.44321	84
OPTICS	0.047619	OPTICS EXPRESS	1.11605	1.44321	84
BIOCHEMISTRY & MOLECULAR BIOLOGY	0.166667	NATURE CHEMICAL BIOLOGY	1.37808	1.44321	84
ENGINEERING, BIOMEDICAL	0.135802	BIOMATERIALS	1.08461	1.43136	81
MATERIALS SCIENCE, BIOMATERIALS	0.135802	BIOMATERIALS	1.08461	0.715682	81
BIOCHEMICAL RESEARCH METHODS	0.075	LAB ON A CHIP	0.955631	1.42732	80
NANOSCIENCE & NANOTECHNOLOGY	0.075	LAB ON A CHIP	0.955631	0.951545	80
CHEMISTRY, MULTIDISCIPLINARY	0.075	LAB ON A CHIP	0.955631	0.475772	80
BIOTECHNOLOGY & APPLIED MICROBIOLOGY	0.141026	NATURE BIOTECHNOLOGY	2.9104	1.41907	78
CHEMISTRY, PHYSICAL	0.179487	JOURNAL OF COLLOID AND INTERFACE SCIENCE	0.851565	1.41907	78
CHEMISTRY, PHYSICAL	0.12	JOURNAL OF MOLECULAR CATALYSIS A-CHEMICAL	0.870239	1.4063	75
PHYSICS, CONDENSED MATTER	0.0945946	JOURNAL OF PHYSICS-CONDENSED MATTER	0.997723	1.40192	74
SPECTROSCOPY	0.0958904	SPECTROCHIMICA ACTA PART A-MOLECULAR AND BIOMOLECULAR SPECTROSCOPY	0.846141	1.39749	73
CHEMISTRY, ORGANIC	0.0958904	JOURNAL OF THE CHEMICAL SOCIETY-PERKIN TRANSACTIONS 1	1.08197	1.39749	73
PLANT SCIENCES	0.136986	PLANT PHYSIOLOGY	0.989927	1.39749	73
NEUROSCIENCES	0.123288	JOURNAL OF NEUROCHEMISTRY	1.10056	1.39749	73
BIOCHEMISTRY & MOLECULAR BIOLOGY	0.123288	JOURNAL OF NEUROCHEMISTRY	1.10056	0.698746	73
MICROBIOLOGY	0.180556	ANTIMICROBIAL AGENTS AND CHEMOTHERAPY	1.74109	1.393	72
PHARMACOLOGY & PHARMACY	0.180556	ANTIMICROBIAL AGENTS AND CHEMOTHERAPY	1.74109	0.6965	72
CHEMISTRY, PHYSICAL	0.0704225	THEORETICAL CHEMISTRY ACCOUNTS	0.624434	1.38844	71
CRYSTALLOGRAPHY	0.0735294	ACTA CRYSTALLOGRAPHICA SECTION B-STRUCTURAL SCIENCE	0.936336	1.37438	68
PHARMACOLOGY & PHARMACY	0.0588235	JOURNAL OF NATURAL PRODUCTS	1.21026	1.37438	68
PLANT SCIENCES	0.0588235	JOURNAL OF NATURAL PRODUCTS	1.21026	0.916254	68
CHEMISTRY, MEDICINAL	0.0588235	JOURNAL OF NATURAL PRODUCTS	1.21026	0.458127	68
PHYSICS, CONDENSED MATTER	0.102941	SOLID STATE IONICS	1.01563	1.37438	68
CHEMISTRY, PHYSICAL	0.102941	SOLID STATE IONICS	1.01563	0.687191	68
SPECTROSCOPY	0.0882353	JOURNAL OF RAMAN SPECTROSCOPY	0.837389	1.37438	68
CHEMISTRY, ORGANIC	0.0895522	JOURNAL OF PHYSICAL ORGANIC CHEMISTRY	0.735589	1.36956	67
CHEMISTRY, PHYSICAL	0.0895522	JOURNAL OF PHYSICAL ORGANIC CHEMISTRY	0.735589	0.684778	67
COMPUTER SCIENCE, INTERDISCIPLINARY APPLICATIONS	0.0895522	COMPUTER PHYSICS COMMUNICATIONS	0.932923	1.36956	67
PHYSICS, MATHEMATICAL	0.0895522	COMPUTER PHYSICS COMMUNICATIONS	0.932923	0.684778	67
CHEMISTRY, INORGANIC & NUCLEAR	0.134328	JOURNAL OF INORGANIC BIOCHEMISTRY	0.952258	1.36956	67
BIOCHEMISTRY & MOLECULAR BIOLOGY	0.134328	JOURNAL OF INORGANIC BIOCHEMISTRY	0.952258	0.684778	67
CHEMISTRY, APPLIED	0.0923077	JOURNAL OF COMBINATORIAL CHEMISTRY	0.97265	1.35969	65
CHEMISTRY, MEDICINAL	0.0923077	JOURNAL OF COMBINATORIAL CHEMISTRY	0.97265	0.906457	65
CHEMISTRY, MULTIDISCIPLINARY	0.0923077	JOURNAL OF COMBINATORIAL CHEMISTRY	0.97265	0.453228	65
BIOTECHNOLOGY & APPLIED MICROBIOLOGY	0.0793651	APPLIED AND ENVIRONMENTAL MICROBIOLOGY	1.23238	1.34951	63
MICROBIOLOGY	0.0793651	APPLIED AND ENVIRONMENTAL MICROBIOLOGY	1.23238	0.674753	63
OPTICS	0.0491803	JOURNAL OF PHYSICS B-ATOMIC MOLECULAR AND OPTICAL PHYSICS	0.916301	1.339	61
PHYSICS, ATOMIC, MOLECULAR & CHEMICAL	0.0491803	JOURNAL OF PHYSICS B-ATOMIC MOLECULAR AND OPTICAL PHYSICS	0.916301	0.669499	61
MATERIALS SCIENCE, COATINGS & FILMS	0.1	APPLIED SURFACE SCIENCE	0.961503	1.33361	60
PHYSICS, APPLIED	0.1	APPLIED SURFACE SCIENCE	0.961503	1.00021	60
PHYSICS, CONDENSED MATTER	0.1	APPLIED SURFACE SCIENCE	0.961503	0.666807	60
CHEMISTRY, PHYSICAL	0.1	APPLIED SURFACE SCIENCE	0.961503	0.333403	60
MULTIDISCIPLINARY SCIENCES	0.0833333	ANNALS OF THE NEW YORK ACADEMY OF SCIENCES	1.19842	1.33361	60
CRYSTALLOGRAPHY	0.101695	CRYSTAL GROWTH & DESIGN	0.907851	1.32814	59
MATERIALS SCIENCE, MULTIDISCIPLINARY	0.101695	CRYSTAL GROWTH & DESIGN	0.907851	0.885426	59
CHEMISTRY, MULTIDISCIPLINARY	0.101695	CRYSTAL GROWTH & DESIGN	0.907851	0.442713	59
CHEMISTRY, INORGANIC & NUCLEAR	0.118644	EUROPEAN JOURNAL OF INORGANIC CHEMISTRY	1.00154	1.32814	59
PHYSICS, APPLIED	0.0689655	MRS BULLETIN	0.518091	1.32257	58
MATERIALS SCIENCE, MULTIDISCIPLINARY	0.0689655	MRS BULLETIN	0.518091	0.661285	58
SPECTROSCOPY	0.0517241	MAGNETIC RESONANCE IN CHEMISTRY	0.871627	1.32257	58
CHEMISTRY, PHYSICAL	0.0517241	MAGNETIC RESONANCE IN CHEMISTRY	0.871627	0.881714	58
CHEMISTRY, MULTIDISCIPLINARY	0.0517241	MAGNETIC RESONANCE IN CHEMISTRY	0.871627	0.440857	58
BIOPHYSICS	0.0862069	BIOPHYSICAL CHEMISTRY	0.761968	1.32257	58
BIOCHEMISTRY & MOLECULAR BIOLOGY	0.0862069	BIOPHYSICAL CHEMISTRY	0.761968	0.881714	58
CHEMISTRY, PHYSICAL	0.0862069	BIOPHYSICAL CHEMISTRY	0.761968	0.440857	58
CELL BIOLOGY	0.140351	NATURE STRUCTURAL & MOLECULAR BIOLOGY	1.08811	1.31691	57
BIOPHYSICS	0.140351	NATURE STRUCTURAL & MOLECULAR BIOLOGY	1.08811	0.877937	57
BIOCHEMISTRY & MOLECULAR BIOLOGY	0.140351	NATURE STRUCTURAL & MOLECULAR BIOLOGY	1.08811	0.438969	57
PHARMACOLOGY & PHARMACY	0.0909091	JOURNAL OF PHARMACOLOGY AND EXPERIMENTAL THERAPEUTICS	1.49342	1.30527	55
OPTICS	0.0727273	OPTICS COMMUNICATIONS	0.942626	1.30527	55
DEVELOPMENTAL BIOLOGY	0.0769231	GENES & DEVELOPMENT	1.0233	1.287	52
GENETICS & HEREDITY	0.0769231	GENES & DEVELOPMENT	1.0233	0.858002	52
CELL BIOLOGY	0.0769231	GENES & DEVELOPMENT	1.0233	0.429001	52
CHEMISTRY, ORGANIC	0.134615	BIOORGANIC CHEMISTRY	0.884927	1.287	52
BIOCHEMISTRY & MOLECULAR BIOLOGY	0.134615	BIOORGANIC CHEMISTRY	0.884927	0.643501	52
CHEMISTRY, MULTIDISCIPLINARY	0.0576923	HELVETICA CHIMICA ACTA	0.926271	1.287	52
BIOCHEMICAL RESEARCH METHODS	0.156863	NATURE PROTOCOLS	0.579212	1.28068	51

## Sheet: S9 Fig
category	frac_pubs	journal_title	coauthors	circle_size	journal_size
ECOLOGY	0.232258	ECOLOGY	0.852033	2.16698	775
MULTIDISCIPLINARY SCIENCES	0.133562	SCIENCE	1.92349	2.07481	584
MULTIDISCIPLINARY SCIENCES	0.185567	PROCEEDINGS OF THE NATIONAL ACADEMY OF SCIENCES OF THE UNITED STATES OF AMERICA	1.18891	2.07369	582
ECOLOGY	0.150709	OECOLOGIA	0.955774	2.06346	564
MULTIDISCIPLINARY SCIENCES	0.126915	NATURE	2.13263	1.99494	457
EVOLUTIONARY BIOLOGY	0.173709	AMERICAN NATURALIST	0.754168	1.97206	426
ECOLOGY	0.173709	AMERICAN NATURALIST	0.754168	0.986029	426
GENETICS & HEREDITY	0.164865	EVOLUTION	0.752518	1.92615	370
EVOLUTIONARY BIOLOGY	0.164865	EVOLUTION	0.752518	1.2841	370
ECOLOGY	0.164865	EVOLUTION	0.752518	0.64205	370
BIOCHEMISTRY & MOLECULAR BIOLOGY	0.109489	MOLECULAR BIOLOGY AND EVOLUTION	0.851279	1.82831	274
GENETICS & HEREDITY	0.109489	MOLECULAR BIOLOGY AND EVOLUTION	0.851279	1.21888	274
EVOLUTIONARY BIOLOGY	0.109489	MOLECULAR BIOLOGY AND EVOLUTION	0.851279	0.609438	274
ENVIRONMENTAL SCIENCES	0.254167	ECOLOGICAL APPLICATIONS	0.863297	1.78516	240
ECOLOGY	0.254167	ECOLOGICAL APPLICATIONS	0.863297	0.892579	240
ENTOMOLOGY	0.0990991	ENVIRONMENTAL ENTOMOLOGY	0.96732	1.75976	222
BIOCHEMISTRY & MOLECULAR BIOLOGY	0.263636	MOLECULAR ECOLOGY	0.914116	1.75682	220
EVOLUTIONARY BIOLOGY	0.263636	MOLECULAR ECOLOGY	0.914116	1.17121	220
ECOLOGY	0.263636	MOLECULAR ECOLOGY	0.914116	0.585606	220
BEHAVIORAL SCIENCES	0.277273	ANIMAL BEHAVIOUR	0.77023	1.75682	220
ZOOLOGY	0.277273	ANIMAL BEHAVIOUR	0.77023	0.878409	220
BIOCHEMISTRY & MOLECULAR BIOLOGY	0.19898	JOURNAL OF CHEMICAL ECOLOGY	1.0436	1.71919	196
ECOLOGY	0.19898	JOURNAL OF CHEMICAL ECOLOGY	1.0436	0.859596	196
BIODIVERSITY CONSERVATION	0.0837989	GLOBAL CHANGE BIOLOGY	1.2726	1.68964	179
ENVIRONMENTAL SCIENCES	0.0837989	GLOBAL CHANGE BIOLOGY	1.2726	1.12643	179
ECOLOGY	0.0837989	GLOBAL CHANGE BIOLOGY	1.2726	0.563213	179
GENETICS & HEREDITY	0.102857	THEORETICAL POPULATION BIOLOGY	0.668	1.68228	175
EVOLUTIONARY BIOLOGY	0.102857	THEORETICAL POPULATION BIOLOGY	0.668	1.12152	175
ECOLOGY	0.102857	THEORETICAL POPULATION BIOLOGY	0.668	0.56076	175
BIOLOGY	0.189655	PROCEEDINGS OF THE ROYAL SOCIETY OF LONDON SERIES B-BIOLOGICAL SCIENCES	0.942356	1.68041	174
PLANT SCIENCES	0.217647	PLANT CELL AND ENVIRONMENT	1.15168	1.67284	170
BIODIVERSITY CONSERVATION	0.213018	CONSERVATION BIOLOGY	0.945619	1.67092	169
ENVIRONMENTAL SCIENCES	0.213018	CONSERVATION BIOLOGY	0.945619	1.11394	169
ECOLOGY	0.213018	CONSERVATION BIOLOGY	0.945619	0.556972	169
PLANT SCIENCES	0.195122	AMERICAN JOURNAL OF BOTANY	0.784168	1.66113	164
FORESTRY	0.161491	FOREST ECOLOGY AND MANAGEMENT	0.782525	1.65512	161
ZOOLOGY	0.0784314	COPEIA	0.762178	1.63852	153
BIOLOGY	0.156863	BIOSCIENCE	1.19281	1.63852	153
ECOLOGY	0.169935	OIKOS	0.800282	1.63852	153
PLANT SCIENCES	0.226027	JOURNAL OF ECOLOGY	0.734483	1.62326	146
ECOLOGY	0.226027	JOURNAL OF ECOLOGY	0.734483	0.811632	146
PLANT SCIENCES	0.164384	NEW PHYTOLOGIST	0.938721	1.62326	146
ECOLOGY	0.243056	ECOLOGY LETTERS	0.992388	1.61877	144
LIMNOLOGY	0.151515	LIMNOLOGY AND OCEANOGRAPHY	0.991914	1.59043	132
OCEANOGRAPHY	0.151515	LIMNOLOGY AND OCEANOGRAPHY	0.991914	0.795215	132
BIODIVERSITY CONSERVATION	0.186047	AMERICAN MIDLAND NATURALIST	0.823401	1.58294	129
ECOLOGY	0.186047	AMERICAN MIDLAND NATURALIST	0.823401	0.791471	129
ZOOLOGY	0.16	JOURNAL OF ANIMAL ECOLOGY	0.855965	1.57268	125
ECOLOGY	0.16	JOURNAL OF ANIMAL ECOLOGY	0.855965	0.786341	125
SOIL SCIENCE	0.219512	SOIL SCIENCE SOCIETY OF AMERICA JOURNAL	0.93477	1.56743	123
BIOCHEMISTRY & MOLECULAR BIOLOGY	0.170732	MOLECULAR PHYLOGENETICS AND EVOLUTION	0.846121	1.56743	123
GENETICS & HEREDITY	0.170732	MOLECULAR PHYLOGENETICS AND EVOLUTION	0.846121	1.04495	123
EVOLUTIONARY BIOLOGY	0.170732	MOLECULAR PHYLOGENETICS AND EVOLUTION	0.846121	0.522476	123
BEHAVIORAL SCIENCES	0.262712	BEHAVIORAL ECOLOGY AND SOCIOBIOLOGY	0.782303	1.55391	118
ZOOLOGY	0.262712	BEHAVIORAL ECOLOGY AND SOCIOBIOLOGY	0.782303	1.03594	118
ECOLOGY	0.262712	BEHAVIORAL ECOLOGY AND SOCIOBIOLOGY	0.782303	0.517971	118
PLANT SCIENCES	0.190476	PLANT PHYSIOLOGY	1.10939	1.51589	105
ENTOMOLOGY	0.0769231	ANNALS OF THE ENTOMOLOGICAL SOCIETY OF AMERICA	0.948573	1.51278	104
ECOLOGY	0.176471	ECOSYSTEMS	1.23632	1.50645	102
MARINE & FRESHWATER BIOLOGY	0.247525	MARINE ECOLOGY-PROGRESS SERIES	1.1054	1.50324	101
OCEANOGRAPHY	0.247525	MARINE ECOLOGY-PROGRESS SERIES	1.1054	1.00216	101
ECOLOGY	0.247525	MARINE ECOLOGY-PROGRESS SERIES	1.1054	0.50108	101
BIOLOGY	0.19802	PROCEEDINGS OF THE ROYAL SOCIETY B-BIOLOGICAL SCIENCES	0.846835	1.50324	101
EVOLUTIONARY BIOLOGY	0.19802	PROCEEDINGS OF THE ROYAL SOCIETY B-BIOLOGICAL SCIENCES	0.846835	1.00216	101
ECOLOGY	0.19802	PROCEEDINGS OF THE ROYAL SOCIETY B-BIOLOGICAL SCIENCES	0.846835	0.50108	101
ECOLOGY	0.28	BIOTROPICA	0.772317	1.5	100
MARINE & FRESHWATER BIOLOGY	0.12	CANADIAN JOURNAL OF FISHERIES AND AQUATIC SCIENCES	0.95054	1.5	100
FISHERIES	0.12	CANADIAN JOURNAL OF FISHERIES AND AQUATIC SCIENCES	0.95054	0.75	100
ZOOLOGY	0.14	JOURNAL OF MAMMALOGY	0.830446	1.5	100
BIOCHEMISTRY & MOLECULAR BIOLOGY	0.134831	JOURNAL OF MOLECULAR EVOLUTION	0.813886	1.46204	89
GENETICS & HEREDITY	0.134831	JOURNAL OF MOLECULAR EVOLUTION	0.813886	0.974695	89
EVOLUTIONARY BIOLOGY	0.134831	JOURNAL OF MOLECULAR EVOLUTION	0.813886	0.487348	89
GEOSCIENCES, MULTIDISCIPLINARY	0.168539	BIOGEOCHEMISTRY	1.0874	1.46204	89
ENVIRONMENTAL SCIENCES	0.168539	BIOGEOCHEMISTRY	1.0874	0.731021	89
ECOLOGY	0.168539	ECOLOGICAL MONOGRAPHS	0.894094	1.46204	89
ORNITHOLOGY	0.0823529	CONDOR	0.774548	1.44706	85
ECOLOGY	0.168675	FUNCTIONAL ECOLOGY	0.701949	1.43931	83
BIOLOGY	0.097561	JOURNAL OF EXPERIMENTAL BIOLOGY	0.802462	1.43536	82
AGRONOMY	0.0987654	PLANT AND SOIL	0.944305	1.43136	81
SOIL SCIENCE	0.0987654	PLANT AND SOIL	0.944305	0.954243	81
PLANT SCIENCES	0.0987654	PLANT AND SOIL	0.944305	0.477121	81
FORESTRY	0.0875	TREE PHYSIOLOGY	0.87355	1.42732	80
PLANT SCIENCES	0.118421	CANADIAN JOURNAL OF BOTANY-REVUE CANADIENNE DE BOTANIQUE	0.895913	1.41061	76
ENTOMOLOGY	0.191781	ECOLOGICAL ENTOMOLOGY	0.62629	1.39749	73
GENETICS & HEREDITY	0.15493	TRENDS IN ECOLOGY & EVOLUTION	0.644769	1.38844	71
EVOLUTIONARY BIOLOGY	0.15493	TRENDS IN ECOLOGY & EVOLUTION	0.644769	0.925629	71
ECOLOGY	0.15493	TRENDS IN ECOLOGY & EVOLUTION	0.644769	0.462815	71
BIODIVERSITY CONSERVATION	0.205882	BIOLOGICAL CONSERVATION	0.801211	1.37438	68
ENVIRONMENTAL SCIENCES	0.205882	BIOLOGICAL CONSERVATION	0.801211	0.916254	68
ECOLOGY	0.205882	BIOLOGICAL CONSERVATION	0.801211	0.458127	68
ENDOCRINOLOGY & METABOLISM	0.21875	HORMONES AND BEHAVIOR	0.921304	1.35463	64
BEHAVIORAL SCIENCES	0.21875	HORMONES AND BEHAVIOR	0.921304	0.677317	64
BIOLOGY	0.109375	PLOS ONE	1.05744	1.35463	64
MARINE & FRESHWATER BIOLOGY	0.245902	MARINE BIOLOGY	1.00328	1.339	61
SOIL SCIENCE	0.245902	SOIL BIOLOGY & BIOCHEMISTRY	0.907	1.339	61
VETERINARY SCIENCES	0.101695	JOURNAL OF WILDLIFE DISEASES	1.17193	1.32814	59
GEOGRAPHY, PHYSICAL	0.12069	LANDSCAPE ECOLOGY	0.763998	1.32257	58
GEOSCIENCES, MULTIDISCIPLINARY	0.12069	LANDSCAPE ECOLOGY	0.763998	0.881714	58
ECOLOGY	0.12069	LANDSCAPE ECOLOGY	0.763998	0.440857	58
GENETICS & HEREDITY	0.293103	JOURNAL OF EVOLUTIONARY BIOLOGY	0.761162	1.32257	58
EVOLUTIONARY BIOLOGY	0.293103	JOURNAL OF EVOLUTIONARY BIOLOGY	0.761162	0.881714	58
ECOLOGY	0.293103	JOURNAL OF EVOLUTIONARY BIOLOGY	0.761162	0.440857	58
EVOLUTIONARY BIOLOGY	0.206897	SYSTEMATIC BIOLOGY	0.933293	1.32257	58
MARINE & FRESHWATER BIOLOGY	0.263158	JOURNAL OF THE NORTH AMERICAN BENTHOLOGICAL SOCIETY	1.05169	1.31691	57
ECOLOGY	0.263158	JOURNAL OF THE NORTH AMERICAN BENTHOLOGICAL SOCIETY	1.05169	0.658453	57
ENVIRONMENTAL SCIENCES	0.157895	JOURNAL OF ENVIRONMENTAL QUALITY	1.14784	1.31691	57
ECOLOGY	0.125	JOURNAL OF APPLIED ECOLOGY	1.37612	1.31114	56
GENETICS & HEREDITY	0.125	HEREDITY	0.782362	1.31114	56
EVOLUTIONARY BIOLOGY	0.125	HEREDITY	0.782362	0.874094	56
ECOLOGY	0.125	HEREDITY	0.782362	0.437047	56
MARINE & FRESHWATER BIOLOGY	0.160714	HYDROBIOLOGIA	0.885221	1.31114	56
MARINE & FRESHWATER BIOLOGY	0.181818	JOURNAL OF EXPERIMENTAL MARINE BIOLOGY AND ECOLOGY	0.873099	1.30527	55
ECOLOGY	0.181818	JOURNAL OF EXPERIMENTAL MARINE BIOLOGY AND ECOLOGY	0.873099	0.652636	55
BIOTECHNOLOGY & APPLIED MICROBIOLOGY	0.12963	GENOME RESEARCH	1.41956	1.2993	54
BIOCHEMISTRY & MOLECULAR BIOLOGY	0.12963	GENOME RESEARCH	1.41956	0.866197	54
GENETICS & HEREDITY	0.12963	GENOME RESEARCH	1.41956	0.433098	54
BIOLOGY	0.134615	PLOS BIOLOGY	1.29589	1.287	52
BIOCHEMISTRY & MOLECULAR BIOLOGY	0.134615	PLOS BIOLOGY	1.29589	0.643501	52
ZOOLOGY	0.134615	WILDLIFE SOCIETY BULLETIN	0.909436	1.287	52
ECOLOGY	0.134615	WILDLIFE SOCIETY BULLETIN	0.909436	0.643501	52

## Sheet: S10 Fig
category	frac_pubs	journal_title	coauthors	circle_size	journal_size
PHYSICS, APPLIED	0.0856987	APPLIED PHYSICS LETTERS	1.20758	2.80504	5496
PHYSICS, CONDENSED MATTER	0.070085	PHYSICAL REVIEW B	1.08508	2.63849	3296
PHYSICS, APPLIED	0.104582	JOURNAL OF APPLIED PHYSICS	1.04785	2.59216	2859
MATERIALS SCIENCE, CERAMICS	0.102681	JOURNAL OF THE AMERICAN CERAMIC SOCIETY	0.720578	2.38831	1529
PHYSICS, MULTIDISCIPLINARY	0.0849802	PHYSICAL REVIEW LETTERS	1.29601	2.38595	1518
POLYMER SCIENCE	0.153315	MACROMOLECULES	0.893747	2.37058	1448
CHEMISTRY, MULTIDISCIPLINARY	0.064688	JOURNAL OF THE AMERICAN CHEMICAL SOCIETY	1.0204	2.33895	1314
MATERIALS SCIENCE, MULTIDISCIPLINARY	0.124617	JOURNAL OF MATERIALS RESEARCH	0.933366	2.24309	979
METALLURGY & METALLURGICAL ENGINEERING	0.0777423	ACTA MATERIALIA	0.706761	2.2295	939
MATERIALS SCIENCE, MULTIDISCIPLINARY	0.0777423	ACTA MATERIALIA	0.706761	1.11475	939
CHEMISTRY, MULTIDISCIPLINARY	0.221622	LANGMUIR	0.926961	2.15192	740
CHEMISTRY, PHYSICAL	0.221622	LANGMUIR	0.926961	1.43462	740
MATERIALS SCIENCE, MULTIDISCIPLINARY	0.221622	LANGMUIR	0.926961	0.717308	740
MATERIALS SCIENCE, COATINGS & FILMS	0.166667	JOURNAL OF THE ELECTROCHEMICAL SOCIETY	0.949796	2.15104	738
ELECTROCHEMISTRY	0.166667	JOURNAL OF THE ELECTROCHEMICAL SOCIETY	0.949796	1.07552	738
NANOSCIENCE & NANOTECHNOLOGY	0.212553	NANO LETTERS	1.01887	2.13429	701
CHEMISTRY, MULTIDISCIPLINARY	0.212553	NANO LETTERS	1.01887	1.77857	701
CHEMISTRY, PHYSICAL	0.212553	NANO LETTERS	1.01887	1.42286	701
PHYSICS, CONDENSED MATTER	0.212553	NANO LETTERS	1.01887	1.06714	701
MATERIALS SCIENCE, MULTIDISCIPLINARY	0.212553	NANO LETTERS	1.01887	0.71143	701
PHYSICS, APPLIED	0.212553	NANO LETTERS	1.01887	0.355715	701
NANOSCIENCE & NANOTECHNOLOGY	0.167401	ADVANCED MATERIALS	1.0468	2.12486	681
CHEMISTRY, MULTIDISCIPLINARY	0.167401	ADVANCED MATERIALS	1.0468	1.77072	681
CHEMISTRY, PHYSICAL	0.167401	ADVANCED MATERIALS	1.0468	1.41657	681
PHYSICS, CONDENSED MATTER	0.167401	ADVANCED MATERIALS	1.0468	1.06243	681
MATERIALS SCIENCE, MULTIDISCIPLINARY	0.167401	ADVANCED MATERIALS	1.0468	0.708287	681
PHYSICS, APPLIED	0.167401	ADVANCED MATERIALS	1.0468	0.354143	681
CHEMISTRY, PHYSICAL	0.113235	CHEMISTRY OF MATERIALS	1.01293	2.12438	680
MATERIALS SCIENCE, MULTIDISCIPLINARY	0.113235	CHEMISTRY OF MATERIALS	1.01293	1.06219	680
PHYSICS, ATOMIC, MOLECULAR & CHEMICAL	0.0986842	JOURNAL OF CHEMICAL PHYSICS	0.868409	2.08793	608
MATERIALS SCIENCE, MULTIDISCIPLINARY	0.0872865	JOURNAL OF MATERIALS SCIENCE	0.775561	2.04136	527
CHEMISTRY, PHYSICAL	0.0760456	SURFACE SCIENCE	0.912661	2.04074	526
PHYSICS, CONDENSED MATTER	0.0760456	SURFACE SCIENCE	0.912661	1.02037	526
CHEMISTRY, PHYSICAL	0.188377	JOURNAL OF PHYSICAL CHEMISTRY B	0.914265	2.02358	499
MULTIDISCIPLINARY SCIENCES	0.11588	SCIENCE	1.61083	2.00129	466
CRYSTALLOGRAPHY	0.113333	JOURNAL OF CRYSTAL GROWTH	0.954302	1.98991	450
MATERIALS SCIENCE, MULTIDISCIPLINARY	0.113333	JOURNAL OF CRYSTAL GROWTH	0.954302	1.32661	450
PHYSICS, APPLIED	0.113333	JOURNAL OF CRYSTAL GROWTH	0.954302	0.663303	450
ENGINEERING, ELECTRICAL & ELECTRONIC	0.072093	JOURNAL OF VACUUM SCIENCE & TECHNOLOGY B	1.2835	1.9751	430
NANOSCIENCE & NANOTECHNOLOGY	0.072093	JOURNAL OF VACUUM SCIENCE & TECHNOLOGY B	1.2835	1.31673	430
PHYSICS, APPLIED	0.072093	JOURNAL OF VACUUM SCIENCE & TECHNOLOGY B	1.2835	0.658367	430
METALLURGY & MINING	0.149883	METALLURGICAL TRANSACTIONS A-PHYSICAL METALLURGY AND MATERIALS SCIENCE	0.745353	1.97282	427
MATERIALS SCIENCE, MULTIDISCIPLINARY	0.149883	METALLURGICAL TRANSACTIONS A-PHYSICAL METALLURGY AND MATERIALS SCIENCE	0.745353	0.98641	427
METALLURGY & METALLURGICAL ENGINEERING	0.0784314	SCRIPTA MATERIALIA	0.732865	1.958	408
NANOSCIENCE & NANOTECHNOLOGY	0.0784314	SCRIPTA MATERIALIA	0.732865	1.30533	408
MATERIALS SCIENCE, MULTIDISCIPLINARY	0.0784314	SCRIPTA MATERIALIA	0.732865	0.652665	408
NANOSCIENCE & NANOTECHNOLOGY	0.142494	MATERIALS SCIENCE AND ENGINEERING A-STRUCTURAL MATERIALS PROPERTIES MICROSTRUCTURE AND PROCESSING	0.754169	1.94579	393
MATERIALS SCIENCE, MULTIDISCIPLINARY	0.142494	MATERIALS SCIENCE AND ENGINEERING A-STRUCTURAL MATERIALS PROPERTIES MICROSTRUCTURE AND PROCESSING	0.754169	0.972897	393
POLYMER SCIENCE	0.186916	POLYMER	0.851348	1.87988	321
POLYMER SCIENCE	0.125402	JOURNAL OF POLYMER SCIENCE PART B-POLYMER PHYSICS	0.837351	1.86957	311
MATERIALS SCIENCE, COATINGS & FILMS	0.128378	THIN SOLID FILMS	0.92934	1.85347	296
PHYSICS, CONDENSED MATTER	0.128378	THIN SOLID FILMS	0.92934	1.3901	296
MATERIALS SCIENCE, MULTIDISCIPLINARY	0.128378	THIN SOLID FILMS	0.92934	0.926734	296
PHYSICS, APPLIED	0.128378	THIN SOLID FILMS	0.92934	0.463367	296
ENGINEERING, ELECTRICAL & ELECTRONIC	0.116364	JOURNAL OF ELECTRONIC MATERIALS	1.1597	1.8295	275
MATERIALS SCIENCE, MULTIDISCIPLINARY	0.116364	JOURNAL OF ELECTRONIC MATERIALS	1.1597	1.21967	275
PHYSICS, APPLIED	0.116364	JOURNAL OF ELECTRONIC MATERIALS	1.1597	0.609833	275
MULTIDISCIPLINARY SCIENCES	0.108614	PROCEEDINGS OF THE NATIONAL ACADEMY OF SCIENCES OF THE UNITED STATES OF AMERICA	1.19383	1.81988	267
MULTIDISCIPLINARY SCIENCES	0.146718	NATURE	1.72667	1.80997	259
PHYSICS, ATOMIC, MOLECULAR & CHEMICAL	0.0753138	CHEMICAL PHYSICS LETTERS	1.0811	1.7838	239
CHEMISTRY, PHYSICAL	0.0753138	CHEMICAL PHYSICS LETTERS	1.0811	0.891899	239
MATERIALS SCIENCE	0.0854701	ACTA METALLURGICA ET MATERIALIA	0.723095	1.77691	234
METALLURGY & MINING	0.0854701	ACTA METALLURGICA ET MATERIALIA	0.723095	1.18461	234
METALLURGY & METALLURGICAL ENGINEERING	0.0854701	ACTA METALLURGICA ET MATERIALIA	0.723095	0.592304	234
CHEMISTRY, PHYSICAL	0.102564	JOURNAL OF MATERIALS CHEMISTRY	0.947068	1.77691	234
MATERIALS SCIENCE, MULTIDISCIPLINARY	0.102564	JOURNAL OF MATERIALS CHEMISTRY	0.947068	0.888456	234
NANOSCIENCE & NANOTECHNOLOGY	0.195238	JOURNAL OF PHYSICAL CHEMISTRY C	0.883796	1.74166	210
CHEMISTRY, PHYSICAL	0.195238	JOURNAL OF PHYSICAL CHEMISTRY C	0.883796	1.16111	210
MATERIALS SCIENCE, MULTIDISCIPLINARY	0.195238	JOURNAL OF PHYSICAL CHEMISTRY C	0.883796	0.580555	210
NANOSCIENCE & NANOTECHNOLOGY	0.160194	ADVANCED FUNCTIONAL MATERIALS	1.036	1.7354	206
CHEMISTRY, MULTIDISCIPLINARY	0.160194	ADVANCED FUNCTIONAL MATERIALS	1.036	1.44617	206
CHEMISTRY, PHYSICAL	0.160194	ADVANCED FUNCTIONAL MATERIALS	1.036	1.15693	206
PHYSICS, CONDENSED MATTER	0.160194	ADVANCED FUNCTIONAL MATERIALS	1.036	0.8677	206
MATERIALS SCIENCE, MULTIDISCIPLINARY	0.160194	ADVANCED FUNCTIONAL MATERIALS	1.036	0.578467	206
PHYSICS, APPLIED	0.160194	ADVANCED FUNCTIONAL MATERIALS	1.036	0.289233	206
CHEMISTRY, PHYSICAL	0.149254	NATURE MATERIALS	1.32048	1.7274	201
PHYSICS, CONDENSED MATTER	0.149254	NATURE MATERIALS	1.32048	1.29555	201
MATERIALS SCIENCE, MULTIDISCIPLINARY	0.149254	NATURE MATERIALS	1.32048	0.863699	201
PHYSICS, APPLIED	0.149254	NATURE MATERIALS	1.32048	0.431849	201
ELECTROCHEMISTRY	0.0717949	ELECTROCHEMICAL AND SOLID STATE LETTERS	1.10618	1.71753	195
MATERIALS SCIENCE, MULTIDISCIPLINARY	0.0717949	ELECTROCHEMICAL AND SOLID STATE LETTERS	1.10618	0.858763	195
NANOSCIENCE & NANOTECHNOLOGY	0.203125	NANOTECHNOLOGY	0.992072	1.71248	192
MATERIALS SCIENCE, MULTIDISCIPLINARY	0.203125	NANOTECHNOLOGY	0.992072	1.14165	192
PHYSICS, APPLIED	0.203125	NANOTECHNOLOGY	0.992072	0.570825	192
CHEMISTRY, MULTIDISCIPLINARY	0.136126	ANGEWANDTE CHEMIE-INTERNATIONAL EDITION	0.962962	1.71078	191
PHYSICS, FLUIDS & PLASMAS	0.178947	PHYSICAL REVIEW E	0.743685	1.70907	190
PHYSICS, MATHEMATICAL	0.178947	PHYSICAL REVIEW E	0.743685	0.854533	190
OPTICS	0.0670391	IEEE PHOTONICS TECHNOLOGY LETTERS	1.19894	1.68964	179
ENGINEERING, ELECTRICAL & ELECTRONIC	0.0670391	IEEE PHOTONICS TECHNOLOGY LETTERS	1.19894	1.12643	179
PHYSICS, APPLIED	0.0670391	IEEE PHOTONICS TECHNOLOGY LETTERS	1.19894	0.563213	179
CHEMISTRY, INORGANIC & NUCLEAR	0.0697674	INORGANIC CHEMISTRY	1.08443	1.67665	172
CHEMISTRY, PHYSICAL	0.0877193	JOURNAL OF PHYSICAL CHEMISTRY	0.946921	1.67475	171
MATERIALS SCIENCE, COATINGS & FILMS	0.129412	APPLIED SURFACE SCIENCE	1.15464	1.67284	170
CHEMISTRY, PHYSICAL	0.129412	APPLIED SURFACE SCIENCE	1.15464	1.25463	170
PHYSICS, CONDENSED MATTER	0.129412	APPLIED SURFACE SCIENCE	1.15464	0.836418	170
PHYSICS, APPLIED	0.129412	APPLIED SURFACE SCIENCE	1.15464	0.418209	170
INSTRUMENTS & INSTRUMENTATION	0.0958084	REVIEW OF SCIENTIFIC INSTRUMENTS	0.945946	1.66704	167
PHYSICS, APPLIED	0.0958084	REVIEW OF SCIENTIFIC INSTRUMENTS	0.945946	0.833519	167
PHYSICS, APPLIED	0.126506	PHYSICA C	1.31257	1.66508	166
METALLURGY & METALLURGICAL ENGINEERING	0.138365	CORROSION	0.70572	1.65105	159
MATERIALS SCIENCE, MULTIDISCIPLINARY	0.138365	CORROSION	0.70572	0.825524	159
CHEMISTRY, MULTIDISCIPLINARY	0.0903226	CHEMICAL COMMUNICATIONS	0.95338	1.64275	155
PHYSICS, CONDENSED MATTER	0.111842	JOURNAL OF MAGNETISM AND MAGNETIC MATERIALS	0.907304	1.63638	152
MATERIALS SCIENCE, MULTIDISCIPLINARY	0.111842	JOURNAL OF MAGNETISM AND MAGNETIC MATERIALS	0.907304	0.818191	152
MECHANICS	0.2	JOURNAL OF THE MECHANICS AND PHYSICS OF SOLIDS	0.62524	1.63207	150
PHYSICS, CONDENSED MATTER	0.2	JOURNAL OF THE MECHANICS AND PHYSICS OF SOLIDS	0.62524	1.08805	150
MATERIALS SCIENCE, MULTIDISCIPLINARY	0.2	JOURNAL OF THE MECHANICS AND PHYSICS OF SOLIDS	0.62524	0.544023	150
MICROSCOPY	0.0821918	ULTRAMICROSCOPY	0.696764	1.62326	146
PHYSICS, CONDENSED MATTER	0.0642857	JOURNAL OF PHYSICS-CONDENSED MATTER	0.972683	1.6096	140
MATERIALS SCIENCE, MULTIDISCIPLINARY	0.142857	MRS BULLETIN	0.597885	1.6096	140
PHYSICS, APPLIED	0.142857	MRS BULLETIN	0.597885	0.804798	140
CHEMISTRY, INORGANIC & NUCLEAR	0.124088	JOURNAL OF SOLID STATE CHEMISTRY	0.971886	1.60254	137
CHEMISTRY, PHYSICAL	0.124088	JOURNAL OF SOLID STATE CHEMISTRY	0.971886	0.80127	137
NANOSCIENCE & NANOTECHNOLOGY	0.189394	SMALL	1.01522	1.59043	132
CHEMISTRY, MULTIDISCIPLINARY	0.189394	SMALL	1.01522	1.32536	132
CHEMISTRY, PHYSICAL	0.189394	SMALL	1.01522	1.06029	132
PHYSICS, CONDENSED MATTER	0.189394	SMALL	1.01522	0.795215	132
MATERIALS SCIENCE, MULTIDISCIPLINARY	0.189394	SMALL	1.01522	0.530143	132
PHYSICS, APPLIED	0.189394	SMALL	1.01522	0.265072	132
CHEMISTRY, PHYSICAL	0.123077	JOURNAL OF COLLOID AND INTERFACE SCIENCE	0.697932	1.58546	130
MATERIALS SCIENCE, MULTIDISCIPLINARY	0.057377	MATERIALS SCIENCE AND ENGINEERING	0.93302	1.56477	122
PHYSICS, CONDENSED MATTER	0.0583333	MATERIALS SCIENCE AND ENGINEERING B-SOLID STATE MATERIALS FOR ADVANCED TECHNOLOGY	1.16372	1.55939	120
MATERIALS SCIENCE, MULTIDISCIPLINARY	0.0583333	MATERIALS SCIENCE AND ENGINEERING B-SOLID STATE MATERIALS FOR ADVANCED TECHNOLOGY	1.16372	0.779693	120
POLYMER SCIENCE	0.110169	JOURNAL OF APPLIED POLYMER SCIENCE	0.755567	1.55391	118
PHYSICS, ATOMIC, MOLECULAR & CHEMICAL	0.0598291	JOURNAL OF PHYSICAL CHEMISTRY A	0.84591	1.55114	117
CHEMISTRY, PHYSICAL	0.0598291	JOURNAL OF PHYSICAL CHEMISTRY A	0.84591	0.77557	117
ENGINEERING, ELECTRICAL & ELECTRONIC	0.0695652	SEMICONDUCTOR SCIENCE AND TECHNOLOGY	1.22973	1.54552	115
PHYSICS, CONDENSED MATTER	0.0695652	SEMICONDUCTOR SCIENCE AND TECHNOLOGY	1.22973	1.03035	115
MATERIALS SCIENCE, MULTIDISCIPLINARY	0.0695652	SEMICONDUCTOR SCIENCE AND TECHNOLOGY	1.22973	0.515174	115
MATERIALS SCIENCE, MULTIDISCIPLINARY	0.133929	APPLIED PHYSICS A-MATERIALS SCIENCE & PROCESSING	1.09672	1.53691	112
PHYSICS, APPLIED	0.133929	APPLIED PHYSICS A-MATERIALS SCIENCE & PROCESSING	1.09672	0.768457	112
MATERIALS SCIENCE, MULTIDISCIPLINARY	0.108108	MATERIALS LETTERS	0.908431	1.53399	111
PHYSICS, APPLIED	0.108108	MATERIALS LETTERS	0.908431	0.766996	111
BIOCHEMISTRY & MOLECULAR BIOLOGY	0.201835	JOURNAL OF BIOLOGICAL CHEMISTRY	1.22336	1.52807	109
MECHANICS	0.0825688	PHILOSOPHICAL MAGAZINE	0.868927	1.52807	109
METALLURGY & METALLURGICAL ENGINEERING	0.0825688	PHILOSOPHICAL MAGAZINE	0.868927	1.22246	109
PHYSICS, CONDENSED MATTER	0.0825688	PHILOSOPHICAL MAGAZINE	0.868927	0.916842	109
MATERIALS SCIENCE, MULTIDISCIPLINARY	0.0825688	PHILOSOPHICAL MAGAZINE	0.868927	0.611228	109
PHYSICS, APPLIED	0.0825688	PHILOSOPHICAL MAGAZINE	0.868927	0.305614	109
PHYSICS, APPLIED	0.186916	JOURNAL OF PHYSICS D-APPLIED PHYSICS	0.940973	1.52204	107
BIOPHYSICS	0.2	BIOPHYSICAL JOURNAL	0.921333	1.51589	105
CHEMISTRY, PHYSICAL	0.163462	CARBON	0.887912	1.51278	104
MATERIALS SCIENCE, MULTIDISCIPLINARY	0.163462	CARBON	0.887912	0.756388	104
OPTICS	0.166667	OPTICS EXPRESS	1.01203	1.50645	102
MECHANICS	0.128713	JOURNAL OF APPLIED MECHANICS-TRANSACTIONS OF THE ASME	0.588112	1.50324	101
PHYSICS, CONDENSED MATTER	0.09	PHILOSOPHICAL MAGAZINE LETTERS	0.825136	1.5	100
MINERALOGY	0.10101	JOM-JOURNAL OF THE MINERALS METALS & MATERIALS SOCIETY	0.561471	1.49673	99
MINING & MINERAL PROCESSING	0.10101	JOM-JOURNAL OF THE MINERALS METALS & MATERIALS SOCIETY	0.561471	1.12254	99
METALLURGY & METALLURGICAL ENGINEERING	0.10101	JOM-JOURNAL OF THE MINERALS METALS & MATERIALS SOCIETY	0.561471	0.748363	99
MATERIALS SCIENCE, MULTIDISCIPLINARY	0.10101	JOM-JOURNAL OF THE MINERALS METALS & MATERIALS SOCIETY	0.561471	0.374182	99
MATERIALS SCIENCE, MULTIDISCIPLINARY	0.131313	JOURNAL OF MATERIALS SCIENCE LETTERS	0.758422	1.49673	99
METALLURGY & METALLURGICAL ENGINEERING	0.2	JOURNAL OF ALLOYS AND COMPOUNDS	0.785838	1.48329	95
CHEMISTRY, PHYSICAL	0.2	JOURNAL OF ALLOYS AND COMPOUNDS	0.785838	0.988862	95
MATERIALS SCIENCE, MULTIDISCIPLINARY	0.2	JOURNAL OF ALLOYS AND COMPOUNDS	0.785838	0.494431	95
ENGINEERING, ENVIRONMENTAL	0.0860215	ENVIRONMENTAL SCIENCE & TECHNOLOGY	0.895877	1.47636	93
ENVIRONMENTAL SCIENCES	0.0860215	ENVIRONMENTAL SCIENCE & TECHNOLOGY	0.895877	0.738181	93
METALLURGY & METALLURGICAL ENGINEERING	0.133333	CORROSION SCIENCE	0.626208	1.46568	90
MATERIALS SCIENCE, MULTIDISCIPLINARY	0.133333	CORROSION SCIENCE	0.626208	0.732841	90
MECHANICS	0.133333	INTERNATIONAL JOURNAL OF FRACTURE	0.604016	1.46568	90
MATERIALS SCIENCE, MULTIDISCIPLINARY	0.133333	INTERNATIONAL JOURNAL OF FRACTURE	0.604016	0.732841	90
OPTICS	0.0689655	IEEE JOURNAL OF SELECTED TOPICS IN QUANTUM ELECTRONICS	1.27718	1.45464	87
ENGINEERING, ELECTRICAL & ELECTRONIC	0.0689655	IEEE JOURNAL OF SELECTED TOPICS IN QUANTUM ELECTRONICS	1.27718	0.96976	87
PHYSICS, APPLIED	0.0689655	IEEE JOURNAL OF SELECTED TOPICS IN QUANTUM ELECTRONICS	1.27718	0.48488	87
ENGINEERING, CHEMICAL	0.126437	POLYMER ENGINEERING AND SCIENCE	0.728446	1.45464	87
POLYMER SCIENCE	0.126437	POLYMER ENGINEERING AND SCIENCE	0.728446	0.72732	87
MATERIALS SCIENCE, COATINGS & FILMS	0.178571	JOURNAL OF VACUUM SCIENCE & TECHNOLOGY A	0.887618	1.44321	84
PHYSICS, APPLIED	0.178571	JOURNAL OF VACUUM SCIENCE & TECHNOLOGY A	0.887618	0.721605	84
PHYSICS, MULTIDISCIPLINARY	0.0843373	JOURNAL DE PHYSIQUE	1.12658	1.43931	83
ENGINEERING, ELECTRICAL & ELECTRONIC	0.13253	IEEE TRANSACTIONS ON ELECTRON DEVICES	1.29348	1.43931	83
PHYSICS, APPLIED	0.13253	IEEE TRANSACTIONS ON ELECTRON DEVICES	1.29348	0.719654	83
POLYMER SCIENCE	0.075	JOURNAL OF POLYMER SCIENCE PART A-POLYMER CHEMISTRY	0.848415	1.42732	80
ENERGY & FUELS	0.116883	JOURNAL OF POWER SOURCES	0.785728	1.41487	77
ELECTROCHEMISTRY	0.116883	JOURNAL OF POWER SOURCES	0.785728	0.707434	77
MATERIALS SCIENCE, CERAMICS	0.0779221	JOURNAL OF THE EUROPEAN CERAMIC SOCIETY	0.69884	1.41487	77
ENGINEERING, MECHANICAL	0.0933333	JOURNAL OF ENGINEERING MATERIALS AND TECHNOLOGY-TRANSACTIONS OF THE ASME	0.654898	1.4063	75
MATERIALS SCIENCE, MULTIDISCIPLINARY	0.0933333	JOURNAL OF ENGINEERING MATERIALS AND TECHNOLOGY-TRANSACTIONS OF THE ASME	0.654898	0.703148	75
METALLURGY & METALLURGICAL ENGINEERING	0.12	ZEITSCHRIFT FUR METALLKUNDE	0.843462	1.4063	75
CHEMISTRY, ANALYTICAL	0.136986	ANALYTICAL CHEMISTRY	0.914578	1.39749	73
PHYSICS, MULTIDISCIPLINARY	0.0694444	INSTITUTE OF PHYSICS CONFERENCE SERIES	1.13802	1.393	72
MECHANICS	0.0857143	ENGINEERING FRACTURE MECHANICS	0.649437	1.38382	70
MATERIALS SCIENCE, COATINGS & FILMS	0.106061	SURFACE & COATINGS TECHNOLOGY	0.779268	1.36466	66
PHYSICS, APPLIED	0.106061	SURFACE & COATINGS TECHNOLOGY	0.779268	0.682329	66
ELECTROCHEMISTRY	0.109375	ELECTROCHIMICA ACTA	0.649904	1.35463	64
ENGINEERING, MECHANICAL	0.109375	WEAR	0.804355	1.35463	64
MATERIALS SCIENCE, MULTIDISCIPLINARY	0.109375	WEAR	0.804355	0.677317	64
MATERIALS SCIENCE, CERAMICS	0.126984	JOURNAL OF ELECTROCERAMICS	0.804239	1.34951	63
METALLURGY & METALLURGICAL ENGINEERING	0.0793651	ISIJ INTERNATIONAL	0.576468	1.34951	63
MATERIALS SCIENCE, CERAMICS	0.0806452	AMERICAN CERAMIC SOCIETY BULLETIN	0.788499	1.34429	62
MATERIALS SCIENCE, MULTIDISCIPLINARY	0.12069	MATERIALS RESEARCH BULLETIN	0.805152	1.32257	58
MINERALOGY	0.137931	JOM	0.648206	1.32257	58
MINING & MINERAL PROCESSING	0.137931	JOM	0.648206	0.991928	58
METALLURGY & METALLURGICAL ENGINEERING	0.137931	JOM	0.648206	0.661285	58
MATERIALS SCIENCE, MULTIDISCIPLINARY	0.137931	JOM	0.648206	0.330643	58
METALLURGY & MINING	0.0877193	METALLURGICAL TRANSACTIONS	0.856233	1.31691	57
METALLURGY & METALLURGICAL ENGINEERING	0.0877193	METALLURGICAL TRANSACTIONS	0.856233	0.658453	57
BIOCHEMISTRY & MOLECULAR BIOLOGY	0.192982	BIOCHEMISTRY	0.979828	1.31691	57
ENGINEERING, MECHANICAL	0.0701754	INTERNATIONAL JOURNAL OF PLASTICITY	0.669707	1.31691	57
MECHANICS	0.0701754	INTERNATIONAL JOURNAL OF PLASTICITY	0.669707	0.877937	57
MATERIALS SCIENCE, MULTIDISCIPLINARY	0.0701754	INTERNATIONAL JOURNAL OF PLASTICITY	0.669707	0.438969	57
ENGINEERING, CHEMICAL	0.160714	TRIBOLOGY LETTERS	0.897826	1.31114	56
ENGINEERING, MECHANICAL	0.160714	TRIBOLOGY LETTERS	0.897826	0.655571	56
ACOUSTICS	0.176471	JOURNAL OF THE ACOUSTICAL SOCIETY OF AMERICA	0.619237	1.28068	51
MATERIALS SCIENCE, MULTIDISCIPLINARY	0.08	MRS INTERNET JOURNAL OF NITRIDE SEMICONDUCTOR RESEARCH	1.57644	1.27423	50
PHYSICS, APPLIED	0.06	JAPANESE JOURNAL OF APPLIED PHYSICS PART 1-REGULAR PAPERS SHORT NOTES & REVIEW PAPERS	1.14163	1.27423	50

## Sheet: S11 Fig
category	frac_pubs	journal_title	coauthors	circle_size	journal_size
PSYCHOLOGY, SOCIAL	0.300733	JOURNAL OF PERSONALITY AND SOCIAL PSYCHOLOGY	0.921773	2.18456	818
PSYCHOLOGY, MULTIDISCIPLINARY	0.363861	PSYCHOLOGICAL SCIENCE	0.885229	1.95479	404
NEUROSCIENCES	0.145658	JOURNAL OF NEUROSCIENCE	1.06966	1.9145	357
PSYCHOLOGY, CLINICAL	0.296407	JOURNAL OF ABNORMAL PSYCHOLOGY	1.01314	1.89281	334
PSYCHOLOGY, MULTIDISCIPLINARY	0.296407	JOURNAL OF ABNORMAL PSYCHOLOGY	1.01314	0.946405	334
PSYCHOLOGY, SOCIAL	0.397306	PERSONALITY AND SOCIAL PSYCHOLOGY BULLETIN	0.820288	1.85457	297
NEUROSCIENCES	0.181481	BRAIN RESEARCH	1.07697	1.82352	270
PSYCHOLOGY, DEVELOPMENTAL	0.446215	DEVELOPMENTAL PSYCHOLOGY	1.08155	1.79976	251
MULTIDISCIPLINARY SCIENCES	0.149798	PROCEEDINGS OF THE NATIONAL ACADEMY OF SCIENCES OF THE UNITED STATES OF AMERICA	1.34602	1.79452	247
PSYCHOLOGY, EXPERIMENTAL	0.477178	COGNITION	0.724522	1.78651	241
RADIOLOGY, NUCLEAR MEDICINE & MEDICAL IMAGING	0.196347	NEUROIMAGE	1.2975	1.75533	219
NEUROIMAGING	0.196347	NEUROIMAGE	1.2975	1.17022	219
NEUROSCIENCES	0.196347	NEUROIMAGE	1.2975	0.585111	219
MULTIDISCIPLINARY SCIENCES	0.149758	SCIENCE	1.12293	1.73698	207
NEUROSCIENCES	0.252427	JOURNAL OF COGNITIVE NEUROSCIENCE	1.15151	1.7354	206
PSYCHOLOGY, SOCIAL	0.321951	JOURNAL OF EXPERIMENTAL SOCIAL PSYCHOLOGY	0.859292	1.73382	205
PSYCHOLOGY, CLINICAL	0.246154	JOURNAL OF CONSULTING AND CLINICAL PSYCHOLOGY	1.07183	1.71753	195
BEHAVIORAL SCIENCES	0.140449	BEHAVIORAL NEUROSCIENCE	0.965135	1.68782	178
NEUROSCIENCES	0.140449	BEHAVIORAL NEUROSCIENCE	0.965135	0.843908	178
BEHAVIORAL SCIENCES	0.16092	NEUROPSYCHOLOGIA	1.04864	1.68041	174
NEUROSCIENCES	0.16092	NEUROPSYCHOLOGIA	1.04864	0.840206	174
PSYCHOLOGY	0.19883	JOURNAL OF EXPERIMENTAL PSYCHOLOGY-LEARNING MEMORY AND COGNITION	0.812376	1.67475	171
PSYCHOLOGY, CLINICAL	0.420382	BEHAVIOUR RESEARCH AND THERAPY	0.913728	1.64692	157
PHYSIOLOGY	0.165605	PSYCHOPHYSIOLOGY	1.09231	1.64692	157
PSYCHOLOGY	0.165605	PSYCHOPHYSIOLOGY	1.09231	1.09795	157
NEUROSCIENCES	0.165605	PSYCHOPHYSIOLOGY	1.09231	0.548975	157
PSYCHIATRY	0.180645	BIOLOGICAL PSYCHIATRY	1.38911	1.64275	155
NEUROSCIENCES	0.180645	BIOLOGICAL PSYCHIATRY	1.38911	0.821374	155
PSYCHOLOGY, EXPERIMENTAL	0.195804	MEMORY & COGNITION	0.762861	1.6165	143
PSYCHIATRY	0.188976	AMERICAN JOURNAL OF PSYCHIATRY	1.35872	1.57785	127
PHYSIOLOGY	0.152	JOURNAL OF NEUROPHYSIOLOGY	0.994021	1.57268	125
NEUROSCIENCES	0.152	JOURNAL OF NEUROPHYSIOLOGY	0.994021	0.786341	125
PSYCHOLOGY, MULTIDISCIPLINARY	0.333333	CURRENT DIRECTIONS IN PSYCHOLOGICAL SCIENCE	0.484433	1.56743	123
MANAGEMENT	0.142857	JOURNAL OF APPLIED PSYCHOLOGY	0.887457	1.55666	119
PSYCHOLOGY, APPLIED	0.142857	JOURNAL OF APPLIED PSYCHOLOGY	0.887457	0.77833	119
BEHAVIORAL SCIENCES	0.27619	PHYSIOLOGY & BEHAVIOR	1.04572	1.51589	105
PSYCHOLOGY	0.398058	COGNITIVE PSYCHOLOGY	0.744389	1.50963	103
PSYCHOLOGY, MULTIDISCIPLINARY	0.281553	AMERICAN PSYCHOLOGIST	0.724438	1.50963	103
PSYCHOLOGY, DEVELOPMENTAL	0.284314	JOURNAL OF ABNORMAL CHILD PSYCHOLOGY	1.25035	1.50645	102
PSYCHOLOGY, CLINICAL	0.284314	JOURNAL OF ABNORMAL CHILD PSYCHOLOGY	1.25035	0.753225	102
PSYCHOLOGY	0.382353	JOURNAL OF MEMORY AND LANGUAGE	0.761999	1.50645	102
PSYCHOLOGY, SOCIAL	0.22549	JOURNAL OF PERSONALITY	0.826269	1.50645	102
PEDIATRICS	0.267327	JOURNAL OF THE AMERICAN ACADEMY OF CHILD AND ADOLESCENT PSYCHIATRY	1.77512	1.50324	101
PSYCHIATRY	0.267327	JOURNAL OF THE AMERICAN ACADEMY OF CHILD AND ADOLESCENT PSYCHIATRY	1.77512	0.751621	101
PSYCHOLOGY, SOCIAL	0.39	JOURNAL OF APPLIED SOCIAL PSYCHOLOGY	0.952711	1.5	100
PSYCHOLOGY, MATHEMATICAL	0.202128	PSYCHONOMIC BULLETIN & REVIEW	0.775312	1.47985	94
PSYCHOLOGY, EXPERIMENTAL	0.202128	PSYCHONOMIC BULLETIN & REVIEW	0.775312	0.739923	94
NEUROSCIENCES	0.148936	CEREBRAL CORTEX	1.17738	1.47985	94
PSYCHOLOGY, EXPERIMENTAL	0.230769	JOURNAL OF EXPERIMENTAL PSYCHOLOGY-GENERAL	0.911862	1.46928	91
PSYCHOLOGY, CLINICAL	0.472527	COGNITIVE THERAPY AND RESEARCH	0.824527	1.46928	91
NEUROSCIENCES	0.255556	NEUROSCIENCE	1.03201	1.46568	90
PSYCHOLOGY	0.191011	PSYCHOLOGICAL REVIEW	0.792895	1.46204	89
NEUROSCIENCES	0.2	NEUROREPORT	1.42047	1.42732	80
PSYCHOLOGY, SOCIAL	0.325	SOCIAL COGNITION	0.722594	1.42732	80
PSYCHOLOGY, EXPERIMENTAL	0.3	COGNITION & EMOTION	0.712313	1.42732	80
PSYCHOLOGY	0.230769	NEUROPSYCHOLOGY	1.09639	1.41907	78
NEUROSCIENCES	0.230769	NEUROPSYCHOLOGY	1.09639	0.709535	78
PSYCHOLOGY	0.435897	HEALTH PSYCHOLOGY	1.09581	1.41907	78
PSYCHOLOGY, SOCIAL	0.246753	JOURNAL OF RESEARCH IN PERSONALITY	0.77666	1.41487	77
BEHAVIORAL SCIENCES	0.181818	BEHAVIOURAL BRAIN RESEARCH	0.984317	1.41487	77
NEUROSCIENCES	0.181818	BEHAVIOURAL BRAIN RESEARCH	0.984317	0.707434	77
PSYCHOLOGY, EXPERIMENTAL	0.407895	EMOTION	0.82483	1.41061	76
NEUROSCIENCES	0.146667	BRAIN AND LANGUAGE	0.966486	1.4063	75
NEUROSCIENCES	0.333333	NATURE NEUROSCIENCE	1.14814	1.393	72
PSYCHOLOGY, CLINICAL	0.402985	BEHAVIOR THERAPY	0.914017	1.36956	67
PSYCHOLOGY, DEVELOPMENTAL	0.373134	JOURNAL OF EXPERIMENTAL CHILD PSYCHOLOGY	0.987357	1.36956	67
PSYCHOLOGY, EXPERIMENTAL	0.373134	JOURNAL OF EXPERIMENTAL CHILD PSYCHOLOGY	0.987357	0.684778	67
LANGUAGE & LINGUISTICS	0.135593	JOURNAL OF VERBAL LEARNING AND VERBAL BEHAVIOR	0.893444	1.32814	59
PSYCHOLOGY	0.135593	JOURNAL OF VERBAL LEARNING AND VERBAL BEHAVIOR	0.893444	0.885426	59
PSYCHOLOGY, EXPERIMENTAL	0.135593	JOURNAL OF VERBAL LEARNING AND VERBAL BEHAVIOR	0.893444	0.442713	59
PSYCHOLOGY, EXPERIMENTAL	0.258621	COGNITIVE SCIENCE	0.716893	1.32257	58
ZOOLOGY	0.333333	ANIMAL BEHAVIOUR	0.843091	1.31691	57
BEHAVIORAL SCIENCES	0.333333	ANIMAL BEHAVIOUR	0.843091	0.658453	57
PUBLIC, ENVIRONMENTAL & OCCUPATIONAL HEALTH	0.207547	AMERICAN JOURNAL OF COMMUNITY PSYCHOLOGY	0.839141	1.29321	53
SOCIAL WORK	0.207547	AMERICAN JOURNAL OF COMMUNITY PSYCHOLOGY	0.839141	0.862138	53
PSYCHOLOGY, MULTIDISCIPLINARY	0.207547	AMERICAN JOURNAL OF COMMUNITY PSYCHOLOGY	0.839141	0.431069	53
PSYCHOLOGY, EDUCATIONAL	0.442308	JOURNAL OF EDUCATIONAL PSYCHOLOGY	0.758954	1.287	52
PSYCHOLOGY, SOCIAL	0.294118	EUROPEAN JOURNAL OF SOCIAL PSYCHOLOGY	0.852636	1.28068	51
NEUROSCIENCES	0.3	EXPERIMENTAL BRAIN RESEARCH	0.878772	1.27423	50
