# Supplementary material for: Differences in Collaboration Patterns across Discipline, Career Stage, and Gender
Source: PLoS Biol. 2016 Nov 4;14(11):e1002573. doi: 10.1371/journal.pbio.1002573 (PMC5096717; doi:10.1371/journal.pbio.1002573)
Supplement: S5 Data — (XLSX) [file pbio.1002573.s022.xlsx]

## Sheet: molbio
size	male_coaus	fem_coaus
168.594	1.07054	0.927952
149.144	0.826393	0.722418
139.528	0.946805	0.836287
129.399	1.61808	0.966293
117.915	1.25424	1.07081
112.889	0.936408	0.837559
89.2188	0.878415	0.848852
85.0412	0.981994	0.831572
82.5591	1.06376	0.933826
80.796	0.819476	0.723612
77.4338	0.844182	0.776871
73.9189	0.899126	0.763221
72.4707	1.17454	0.914145
69.282	1.07006	0.84285
67.6461	0.879103	0.792283
66.5432	0.962205	0.733856
65.8483	1.16042	0.939448
63.8749	0.947221	0.71757
61.7414	1.03949	0.85899
60.531	0.943652	0.706779
60.3656	0.994646	0.797199
60.1332	0.850247	0.784704
59.9667	1.30739	0.813174
59.397	1.03166	0.81949
59.2284	0.937145	0.773931
58.3781	1.01101	1.01042
58.3438	0.855116	0.820885
58.0345	0.837695	0.798122
57.8619	0.95893	0.820278
57.55	1.18164	1.088
57.4804	1.13168	0.975291
57.1664	0.972214	0.877352
56.8859	1.07985	0.832271
56.6745	1.08535	0.836987
55.1362	0.910203	0.802738
54.9545	1.05583	0.86218
54.2955	0.969914	0.794139
54	0.82123	0.736675
53.1037	0.825504	0.743485
53.1037	0.95978	0.890581
52.9528	1.01545	0.872159
52.1153	1.01768	0.78418
50.8331	1.1143	0.807777
50.5569	0.887558	0.729609
50.04	1.00898	1.07416
49.8799	0.860861	0.861425
49.1528	1.05539	0.876415
48.9081	0.894286	0.758716
48.7442	0.79859	0.859305
48.5798	1.0513	0.946399
48.4974	1.1049	1.06635
48.4974	0.892101	0.819103
48.4149	1.03594	0.819864
48.2908	1.1165	0.892767
47.8748	0.986017	0.871086
47.4131	1.05781	0.900725
47.244	1.04454	0.855029
46.5188	1.0333	0.927166
46.1736	1.16678	0.926697
45.4313	0.940022	0.880439
45.3872	1.13902	0.978326
45.2548	0.920446	0.789504
44.5421	0.960908	0.850399
43.1741	0.992867	0.972807
42.4735	0.946524	0.856233
42.19	1.23429	0.869463
41.9524	1.01123	0.756962
41.8091	0.981178	0.862233
37.47	1.06173	0.884156

## Sheet: ecology
size	male_coaus	fem_coaus
229.948	0.971443	0.860328
110.833	1.20553	0.939783
95.5406	0.937085	0.894093
95.4777	0.831648	0.788871
79.7496	0.994811	1.03449
68.4982	0.88439	0.812772
55.857	0.886867	0.764713
54.5894	1.06318	0.979595
51.4198	0.92273	0.665849
50.5173	1.05115	0.923234
49.8397	1.09093	0.835774
49.4773	0.874126	0.80282
47.2864	1.01156	0.878789
43.5431	1.11211	1.19515
42.8486	1.02196	0.887009
41.0366	1.2233	1.10671

## Sheet: psychology
size	male_coaus	fem_coaus
162.333	1.0564	0.924179
136.572	1.02804	0.893604
91.913	1.1147	1.14857
87.3613	0.808211	0.786604
87.0862	0.913987	0.891545
83.4026	0.951329	0.847512
61.3514	1.05807	0.939913
60.3324	0.903194	0.877909
58.5833	0.911845	0.947363
49.96	1.2983	1.12414
45.3872	1.1388	1.04491
44.5421	1.09392	0.949214
44.1362	1.22629	0.987529
43.2204	0.897568	0.910715
42.2374	1.05729	1.15229
41.2311	1.12344	1.03666
39.7492	1.06764	1.202
39.5474	1.21493	1.25897
38.3145	1.54244	1.66249
37.2022	1.54742	1.35662
32.9848	0.997684	1.0664
31.305	1.25875	1.30502
31.241	1.55242	1.50083
27.8568	1.29993	1.4709

## Sheet: matscience
size	male_coaus	fem_coaus
265.066	1.13595	1.02099
219.126	0.754764	0.789321
179.533	0.912008	0.881626
150.599	0.840821	0.829614
134.863	1.41234	1.29905
119.7	0.985272	0.993098
104.919	0.800729	0.819782
103.46	1.0711	1.01223
94.6361	0.953019	0.963188
92.3905	1.03364	1.137
92.152	0.851888	0.810529
91.6733	0.877564	0.84591
89.7775	0.993419	0.831129
86.8562	0.981835	0.90989
85.6037	0.899016	0.908206
83.4745	1.05564	0.979226
82.5591	0.973356	0.892907
77.5887	0.914199	0.997017
76.3937	0.913144	0.826587
75.921	0.928509	0.892513
72.9383	1.06685	0.961067
69.8856	0.915445	0.968086
66.5132	0.955282	0.917715
64.1249	0.972555	1.2816
61.2862	1.011	0.954001
60.3987	0.967092	0.967819
60.0999	0.915421	1.58308
56	0.924769	0.833539
55.6776	0.935141	1.10268
54.9909	1.01711	1.09395
49.8799	1.04656	0.895967

## Sheet: chemeng
size	male_coaus	fem_coaus
370.546	0.99737	0.952919
229.199	0.865702	0.924401
170.857	1.10736	1.1017
156.678	0.977993	0.919355
110.761	1.16273	1.09496
93.3381	1.0302	0.960733
90.4212	0.984737	0.900872
89.6214	1.06321	1.01516
88.4081	1.03357	1.1027
87.4986	1.07253	1.05284
86.3018	1.03476	1.01341
79.5236	0.993945	0.966083
75.02	0.928633	0.991409
74.5922	1.03391	1.12462
71.4423	0.998431	1.11835
68.9057	1.0507	1.04087
67.7938	1.08874	1.08146
67.2607	0.974509	1.03526
66.0908	1.046	0.99874
63.8436	1.04489	0.994049
63.7809	1.10081	1.143
60.7289	1.02898	1.0022

## Sheet: chemistry
size	male_coaus	fem_coaus
308.214	0.91131	0.876222
287.388	0.923754	0.973806
284.633	1.09838	1.04624
277.964	1.00723	0.919165
203.165	1.04241	0.941546
182.22	0.917565	0.883231
138.694	1.42618	1.43798
132.695	1.16697	1.16542
126.222	0.93418	0.97249
126.19	0.985288	0.923802
125.698	1.01303	0.954347
124.692	1.02444	0.980247
124.177	1.11911	1.19988
119.046	0.991363	0.9737
117.303	1.15503	1.12207
112.588	0.877916	0.858978
109.508	1.0159	0.921326
104.747	1.11824	1.09161
101.232	1.10027	1.00859
100.359	0.90616	0.930412
100.02	0.997155	1.04361
98.732	0.934557	0.894464
97.0567	1.05041	0.98704
96.2081	0.951665	0.87679
95.247	0.998643	0.986961
89.6883	0.972368	0.935299
87.7952	0.983808	0.905682
84.8528	1.00959	0.98257
80.2745	1.06847	0.972606
78.8162	1.14582	1.02646
75.8419	1.01147	1.11098
74.8064	1.12027	1.30017
73.5935	1.38452	1.26169
